1 **Title: Eastern Equine Encephalitis Virus Rapidly Infects and**  
2 **Disseminates in the Brain and Spinal Cord of Infected**  
3 **Cynomolgus Macaques Following Aerosol Challenge**

4 Janice A Williams<sup>1\*</sup>, Simon Y Long<sup>1\*</sup>, Xiankun Zeng<sup>1</sup>, Kathleen Kuehl<sup>1</sup>, April M  
5 Babka<sup>1</sup>, Neil M Davis<sup>1</sup>, Jun Liu<sup>1</sup>, John C Trefry<sup>2</sup>, Sharon Daye<sup>1</sup>, Paul R  
6 Facemire<sup>1</sup>, Patrick L Iversen<sup>3</sup>, Sina Bavari<sup>4</sup>, Margaret L Pitt<sup>2, 4#</sup>, Farooq Nasar<sup>2#</sup>

7

8 *<sup>1</sup>Pathology Division, United States Army Medical Research Institute of Infectious*  
9 *Diseases, 1425 Porter Street, Frederick, Maryland, USA*

10

11 *<sup>2</sup>Virology Division, United States Army Medical Research Institute of Infectious*  
12 *Diseases, 1425 Porter Street, Frederick, Maryland, USA*

13

14 *<sup>3</sup>Therapeutics Division, United States Army Medical Research Institute of*  
15 *Infectious Diseases, 1425 Porter Street, Frederick, Maryland, USA*

16

17 *<sup>4</sup>Office of the Commander, United States Army Medical Research Institute of*  
18 *Infectious Diseases, 1425 Porter Street, Frederick, Maryland, USA*

19

20

21 \*J.A.W. and S.Y.L. contributed equally to this work.

22

23 #Corresponding authors:

24 Farooq Nasar

25 Mailing address: United States Army Medical Research Institute of Infectious

26 Diseases, 1425 Porter Street, Frederick, MD 21702

27 Phone: (301)-619-1317.

28 Email: farooq.nasar.ctr@mail.mil, fanasar@icloud.com

29

30 Margaret L. Pitt

31 Mailing address: United States Army Medical Research Institute of Infectious

32 Diseases, 1425 Porter Street, Frederick, MD 21702

33 Phone: (301)-619-4230.

34 Email: margaret.l.pitt.civ@mail.mil

35

36 **ABSTRACT**

37 Eastern equine encephalitis virus (EEEV) is mosquito-borne virus that produces  
38 fatal encephalitis in humans. We recently conducted a first of its kind study to  
39 investigate EEEV clinical disease course following aerosol challenge in a  
40 cynomolgus macaque model utilizing the state of the art telemetry to measure  
41 critical physiological parameters. Following challenge, all parameters were  
42 rapidly and profoundly altered, and all nonhuman primates (NHPs) met the  
43 euthanasia criteria. In this study, we performed the first comprehensive pathology  
44 investigation of tissues collected at euthanasia to gain insights into EEEV  
45 pathogenesis. Viral RNA and proteins as well as microscopic lesions were  
46 absent in the visceral organs. In contrast, viral RNA and proteins were readily  
47 detected throughout the brain including autonomic nervous system (ANS) control  
48 centers and spinal cord. However, despite presence of viral RNA and proteins,  
49 majority of the brain and spinal cord tissues exhibited minimal or no microscopic  
50 lesions. The virus tropism was restricted primarily to neurons, and virus particles  
51 (~61-68 nm) were present within axons of neurons and throughout the  
52 extracellular spaces. However, active virus replication was absent or minimal in  
53 majority of the brain and was limited to regions proximal to the olfactory tract.  
54 These data suggest that EEEV initially replicates in/near the olfactory bulb  
55 following aerosol challenge and is rapidly transported to distal regions of the  
56 brain by exploiting the neuronal axonal transport system to facilitate neuron-to-  
57 neuron spread. Once within the brain, the virus gains access to the ANS control  
58 centers likely leading to disruption and/or dysregulation of critical physiological

59 parameters to produce severe disease. Moreover, the absence of microscopic  
60 lesions strongly suggests that the underlying mechanism of EEEV pathogenesis  
61 is due to neuronal dysfunction rather than neuronal death. This study is the first  
62 comprehensive investigation of EEEV clinical disease course and pathogenesis  
63 in a NHP model and will provide significant insights into the evaluation of  
64 countermeasure.

65

66 **Author Summary:**

67 EEEV is an arbovirus endemic in parts of North America and is able to  
68 produce fatal encephalitis in humans and domesticated animals. Despite multiple  
69 human outbreaks during the last 80 years, there are still no therapeutic or  
70 vaccines to treat or prevent human disease. One critical obstacle in the  
71 development of effective countermeasure is the lack of insights into EEEV  
72 pathogenesis in a susceptible animal host. We recently conducted a study in  
73 cynomolgus macaques to investigate the disease course by measuring clinical  
74 parameters relevant to humans. Following infection, these parameters were  
75 rapidly and profoundly altered leading to severe disease. In this study, we  
76 examined the potential mechanisms that underlie pathogenesis to cause severe  
77 disease. The virus was present in many parts of the brain and spinal cord,  
78 however, little or no pathological lesions as well as active virus replication were  
79 observed. Additionally, neurons were the predominant target of EEEV and virus  
80 transport was facilitated by axonal transport system to spread neuron-to-neuron  
81 throughout the brain and spinal cord. These data show that EEEV likely hijacks

82 host cell transport system to rapidly spread in the brain and local/global neuronal

83 dysfunction rather than death is the principal cause of severe disease.

84

## 85 INTRODUCTION

86 The genus *Alphavirus* in the family *Togaviridae* is comprised of small,  
87 spherical, enveloped viruses with genomes consisting of a single stranded,  
88 positive-sense RNA, ~11-12 kb in length. Alphaviruses comprise 31 recognized  
89 species and the vast majority utilize mosquitoes as vectors for transmission into  
90 vertebrate hosts [1-6]. Mosquito-borne alphaviruses can spillover into the human  
91 population and cause severe disease. Old World alphaviruses (chikungunya,  
92 o'nyong-nyong, Sindbis, and Ross River) can cause disease characterized by  
93 rash and debilitating arthralgia, whereas New World viruses [eastern, western,  
94 and Venezuelan equine encephalitis virus] can cause fatal encephalitis.

95 Eastern equine encephalitis virus (EEEV) is an important pathogen of  
96 medical and veterinary importance in North America. EEEV is endemic in the  
97 eastern United States and Canada, and the Gulf coast of the United States. The  
98 main transmission cycle is between passerine birds and *Culiseta melanura*  
99 mosquitoes. However, this cycle can spillover into humans and domesticated  
100 animals and cause severe disease with human and equid case-fatality rates of  
101 30-90% and >90%, respectively [6, 7]. Human survivors can suffer from  
102 debilitating and permanent long-term neurological sequelae with rates of 35-80%  
103 [6, 7]. In addition to natural infections, EEEV was developed as a biological  
104 weapon during the cold war by the U.S. and the former Union of Soviet Socialist  
105 Republics (USSR). Currently, there are no licensed therapeutics and/or vaccines  
106 to prevent or treat EEEV infection and the U.S. population remains vulnerable to  
107 natural disease outbreaks and/or bioterrorism events.

108           In order to develop effective vaccine and therapeutic countermeasures,  
109 nonhuman primate (NHP) models have been utilized to recapitulate various  
110 aspects of human disease, as well as, to gain insight into viral pathogenesis. We  
111 recently conducted a study in cynomolgus macaques to explore EEEV disease  
112 course utilizing advance telemetry following aerosol challenge. All physiological  
113 parameters observed including temperature, respiration, activity, heart rate,  
114 blood pressure, electrocardiogram (ECG), and electroencephalography (EEG)  
115 were considerably altered post-challenge for the duration of ~24-100 hrs. In  
116 addition, all NHPs exhibited profound disruption of the circadian rhythm, sleep,  
117 and food/fluid intake. Accordingly, all NHPs met the euthanasia criteria by ~106-  
118 140 hours post-infection (hpi). In this study, we performed a detailed investigation  
119 of visceral organs, brain, and spinal cord harvested at euthanasia to gain insights  
120 into EEEV pathogenesis.

121

## 122 **RESULTS**

123 **EEEV Associated Pathology in the Visceral Organs.** Visceral organs including  
124 the heart, liver, lung, kidney, and spleen were collected from NHPs at the time of  
125 euthanasia and were examined for virus and/or host induced pathology (Supp.  
126 Table 1). There were no EEEV associated necrotic and/or inflammatory lesions  
127 in the visceral organs of any of NHPs (Figure 1, Supp. Table 1). In addition, *in*  
128 *situ* hybridization (ISH) and immunohistochemistry (IHC) were unable to detect  
129 presence of viral RNA or proteins in any organs, respectively (Supp. Figures 1  
130 and 2).

131 **EEEV Associated Pathology in the Brain and Spinal Cord.** The projections  
132 from the olfactory bulb connect to the amygdala and hippocampus via the  
133 primary olfactory cortex. Our companion manuscript reported the presence of  
134 infectious virus in the olfactory bulb of NHPs at the time of euthanasia with titers  
135 ranging from 4.1-7.9 log<sub>10</sub> PFU/mL. Accordingly, the amygdala and hippocampus  
136 were investigated for virus and/or host induced pathology. Mild to moderate  
137 necrotic and inflammatory lesions were observed throughout both regions of the  
138 brain in all NHPs (Figure 2). The necrotic lesions were characterized by neuronal  
139 degeneration, satellitosis, and necrosis, as well as vacuolation of the neutrophil  
140 (Figure 2). The inflammatory lesions comprised predominantly of neutrophilic  
141 infiltrates in all NHP sections except the hippocampus of NHP #2. Furthermore,  
142 substantial viral RNA and proteins were readily detected in the amygdala and  
143 hippocampus of all NHPs (Figure 2).

144         The projection of the amygdala and hippocampus connect to other parts of  
145 the midbrain, which in turn are connected to both the forebrain and the hindbrain.  
146 We next examined various structures in these regions including the  
147 hypothalamus, thalamus, corpus striatum, mesencephalon, medulla oblongata,  
148 frontal cortex, and cerebellum for virus and/or host induced pathology (Supp.  
149 Table 1). In contrast to the pathology observed in the amygdala and  
150 hippocampus, the majority of these tissue sections displayed minimal or no  
151 microscopic lesions (Figures 3 and 4). Few focal lesions were observed in some  
152 regions and were restricted primarily to the corpus striatum, thalamus,  
153 mesencephalon, and medulla oblongata (Figure 4). The focal lesions comprised



154 of minimal to mild neuronal degeneration, necrosis, neuropil vacuolation, gliosis,  
155 and neuronal satellitosis (Figure 4). The latter was most pronounced in the  
156 corpus striatum of NHP #1, which also displayed mild microhemorrhages (Figure  
157 4). NHPs displayed mild to marked neutrophilic inflammation in the brain  
158 extending into the meninges (Figure 4). Additionally, perivascular infiltrates  
159 ranged from minimal lymphocytic, mononuclear and neutrophilic, to moderate  
160 and predominantly neutrophilic (Figure 4). The ISH staining detected substantial  
161 viral RNA in the brain tissue of all NHPs (Figure 5). The IHC staining showed  
162 mild to marked immunoreactivity of neurons in all sections of the brain with the  
163 most pronounced in the corpus striatum, thalamus, mesencephalon, and medulla  
164 oblongata (Figure 6).

165         The cervical, thoracic, and lumbar spinal cord were also examined (Supp.  
166 Table 1). In contrast to the brain sections, all three sections of the spinal cord  
167 displayed minimal or no pathological lesions (Figure 7). The main feature  
168 observed in the spinal cord sections was comprised of some inflammation and  
169 myelitis. Viral RNA was readily detected in the cervical spinal cord of all four  
170 NHPs via ISH, whereas minimal or no RNA was detected in the thoracic and  
171 lumbar sections in three of the four NHPs (Figure 8). Substantial viral RNA was  
172 detected in thoracic and lumbar sections of NHP #3 (Figure 8). This finding was  
173 further verified by IHC staining that displayed a similar pattern (Figure 9).

174 **EEEV Cell Tropism in the Thalamus of the NHPs.** After establishment of  
175 EEEV infection in various brain regions, we next investigated the virus tropism in  
176 the thalamus of all infected NHPs by examine infection in the astrocytes,

177 microglia, and the neurons. Tissue sections were stained for viral RNA and  
178 cellular markers of astrocytes (GFAP), microglia (CD68), and neurons (NeuN)  
179 (Figures 10-12). Minimal or no overlap was observed between viral RNA and  
180 GFAP or CD68, indicating minimal or no infection in the astrocytes and microglia,  
181 respectively (Figures 10 and 11). In contrast, considerable overlap of viral RNA  
182 and NeuN was observed in all NHPs suggesting that the majority of the viral  
183 infection was limited to the neurons (Figure 12).

#### 184 **Localization of EEEV Virions in the Thalamus of the NHPs via Transmission**

185 **Electron Microscopy (TEM).** The morphological analysis of various brain  
186 structures by the TEM showed no overt signs of apoptosis and/or necrosis as the  
187 majority of tissue sections displayed intact mitochondria and nuclei. TEM  
188 analysis showed marked presence of EEEV particles in the extracellular spaces  
189 throughout the thalamus of all NHPs (Figure 13, Supp. Figure 3). The majority of  
190 the virus particles were spherical, ~61-68 nm in diameter, and were in close  
191 proximity to plasma membranes of the surrounding cells (Figure 14). Virus  
192 particles were detected juxtaposed to myelin sheaths, surrounding the axons, as  
193 well as near synapses (Figure 15, Supp. Figure 4).

194 The intracellular localization of EEEV within the thalamus was examined  
195 by detecting the presence of EEEV particles within the axons of neurons. Virus  
196 particles, ~62-67 nm in diameter, were detected within the axons in all NHPs  
197 (Figure 16). Surprisingly, the majority of the particles were not contained within  
198 vesicles and appeared to be free virions. In two sequential sections, ~80 nm  
199 apart, of an axon, the quantity of EEEV virions present inside an axon was

200 assessed. The sections showed the presence of 18 and 17 particles, respectively  
201 (Figure 17 A and B). This finding highlights the potential of large quantity of  
202 particles that can migrate through a single axon to infect other neurons.

203         Next, we sought to investigate active virus replication centers by detecting  
204 cytopathic vacuoles and budding virions in infected cells. Cells with active  
205 replication were rare in the brain, however, they were detected in all NHPs. The  
206 majority of the virus replication was localized to the amygdala, hippocampus,  
207 thalamus, and hypothalamus (Figures 18 and 19, Supp. Figure 5). Extensive  
208 cytopathic vacuoles with attached and free nucleocapsid, ~40 nm in diameter,  
209 were present within the cytoplasm of infected cells (Figures 18 and 19).  
210 Furthermore, infectious virions ~65-68 nm in diameter were observed budding  
211 from infected host cell plasma membrane (Figure 19).

212         Another interesting finding in the TEM experiments was the presence of  
213 virus particles enclosed within undefined vesicular compartments in the  
214 extracellular space of all NHP tissues (Figure 20). The vesicles were composed  
215 either exclusively of virions or mixture of particles and cellular component of  
216 similar size and shape (Figure 20). Free virions could also be found adjacent to  
217 the enclosed vesicle (Figure 20 A and C).

218         Although rare, necrotic lesions were visible within the thalamus and were  
219 detected by TEM. Considerable degeneration of the cellular architecture was  
220 observed with loss membrane integrity, disintegration of organelles, and cell lysis  
221 (Figure 21). EEEV particles were readily detected scattered throughout the  
222 remaining cell debris (Figure 21).

## 223 **DISCUSSION**

224           The susceptibility of cynomolgus macaques to North American lineage of  
225 EEEV via the aerosol route has been explored previously [8-10]. However, in-  
226 depth pathology studies have not been performed to gain insights into the mode  
227 of virus dissemination following aerosol challenge. Following challenge, there are  
228 two potential routes of virus dissemination in the NHP host. The initial virus  
229 replication in the respiratory tract followed by systemic infection and subsequent  
230 access to central nervous system (CNS). Alternatively, the olfactory epithelium  
231 and bulb could serve as the initial site of virus replication followed by virus  
232 transport and infection of the olfactory tract with spread to the distal regions of  
233 the brain. The data from our study showed no evidence of gross and/or  
234 microscopic changes, as well as viral RNA or proteins in the lung, liver, heart,  
235 spleen, and kidneys. In contrast, pathological lesions were detected in the brain  
236 comprising of neutrophilic inflammation, neuronal degeneration, and necrosis.  
237 EEEV RNA and proteins were also readily detected throughout many parts of the  
238 brain and spinal cord. A gradation of viral RNA and proteins was observed the  
239 most in the cervical region due to its proximity to the brainstem and least in the  
240 lumbar region. Lastly, the data from our companion manuscript showed presence  
241 of high EEEV infectious titers at the olfactory bulb of all NHPs. Taken together,  
242 these data support the rapid and direct spread of EEEV via the olfactory bulb into  
243 the brain followed by dissemination into the spinal cord.

244           The dissemination of EEEV following aerosol infection has not been  
245 investigated in previous macaque studies; however, it has been examined in

246 mice, guinea pigs, and marmosets [11-14]. In these previous studies, virus was  
247 localized almost exclusively in the brain and was readily detected in the frontal  
248 cortex, corpus striatum, thalamus, hippocampus, mesencephalon, pons, medulla  
249 oblongata, and cerebellum [11-14]. In contrast, EEEV could not be detected in  
250 the heart, liver, lung, spleen, and kidney of guinea pigs and marmosets [11, 14].  
251 Murine studies displayed similar pattern to guinea pigs and marmosets, however,  
252 EEEV was detected lung and heart [12, 13]. Our NHP data are in agreement with  
253 the guinea pig and marmoset studies. The presence of virus in the mouse lung  
254 and heart tissues shows important differences between the murine and other  
255 animal models.

256 In nature, EEEV is transmitted via a mosquito bite and can cause fatal  
257 encephalitis in many mammalian species including horses, sheep, cattle,  
258 alpacas, llamas, deer, dogs, pigs, and humans [15-57]. Following the bite of an  
259 infected mosquito, the virus replicates locally in skeletal muscle cells, fibroblasts,  
260 and osteoblasts, gains access to the peripheral tissues and organs, and  
261 eventually disseminates into the CNS to cause fatal encephalitis [58]. During the  
262 course of infection, extensive pathology is observed in the visceral tissues and  
263 organs including lungs, liver, kidneys, spleen, intestine, as well as cardiac and  
264 skeletal muscle [21, 23, 26, 28, 48, 52, 57]. The pathology is comprised of severe  
265 pulmonary edema and congestion, multifocal hemorrhage, splenic atrophy,  
266 myocarditis, and necrosis [21, 23, 26, 28, 48, 52, 57]. The lack of similar  
267 pathology in visceral organs and tissues in animals infected via an aerosol route

268 demonstrates that the route of infection substantially alters the virus  
269 dissemination [11-14].

270           EEEV localizes in the CNS of many mammalian species including humans  
271 regardless of the route of infection [9-30, 32-47, 49-66]. Virus can be readily  
272 detected in basal ganglia, hippocampus, frontal cortex, pons, thalamus,  
273 substantia nigra, mesencephalon, medulla oblongata, cerebellum, and spinal  
274 cord with minimal to moderate lesions [9-30, 32-47, 49-66]. These microscopic  
275 findings consist of neuronal degeneration and necrosis, neuropil vacuolation,  
276 gliosis, and satellitosis, neuronophagia, lymphocytic perivascular cuffing,  
277 lymphocytic meningitis, perivascular cuffs, neutrophil infiltrate, and  
278 microhemorrhage. The tropism of EEEV is predominantly limited to the neurons,  
279 however, astrocytes and microglia cells are also infected. The results of our  
280 study are in agreement with the majority of previously reported findings, however,  
281 there are several important differences. First, in our study, the majority of the  
282 cellular architecture in all brain regions remained intact and the focal  
283 degenerative and necrotic lesions were limited to the amygdala, hippocampus,  
284 corpus striatum, thalamus, mesencephalon, and medulla oblongata. Second,  
285 neutrophils comprised the majority of inflammatory infiltrates, whereas minimal  
286 lymphocytic infiltrates were observed. Third, the tropism of EEEV was almost  
287 exclusively to neurons. Fourth, microscopic findings were either absent or  
288 minimal in all sections of the spinal cord. These differences highlight that aerosol  
289 infection can substantially alter virus pathogenesis.

290 Limited studies have examined EEEV pathogenesis in the brain utilizing  
291 TEM [16, 29, 36, 67]. These studies showed the presence of infectious particles,  
292 ~55-60 nm in diameter, localized almost exclusively in the extracellular spaces.  
293 The evidence of virus replication was either absent or rare in the tissues.  
294 Cytopathic vacuoles and nucleocapsid, ~28 nm in diameter, were observed in the  
295 cytoplasm of infected neurons and microglia. Infected and uninfected neurons,  
296 astrocytes, and microglia displayed dilated rough endoplasmic reticulum. Our  
297 study is in agreement with most of the previously reported findings, with one  
298 exception with regards to the size of virus particles and nucleocapsid. The  
299 infectious particle and nucleocapsid size was smaller in the previous human and  
300 mouse TEM studies than the recent cryo-electron microscopy (cryo-EM) studies  
301 that estimate the infectious particle and nucleocapsid size of ~65-70 and ~40-45  
302 nm, respectively [3, 68-70]. Our study is in agreement with the latter data. One  
303 potential explanation for this discrepancy is the shrinking effects of formalin  
304 fixation, dehydration, and paraffin embedding. The process of inactivation and  
305 embedding can reduce tissue size by up to 15% [71-74].

306 Axonal transport is an essential homeostatic process responsible for  
307 movement of RNA, proteins, and organelles within neurons [75]. Viruses  
308 including rabies, polio, West Nile, and Saint Louis encephalitis can utilize this  
309 critical mechanism and disseminate in the CNS via neuron-to-neuron spread [76-  
310 78]. The data from the present study showed that viral replication was limited to  
311 the olfactory bulb and proximal regions including the amygdala, hippocampus,  
312 thalamus, and hypothalamus. Viral RNA, proteins, and infectious particles were

313 also detected in distal parts of the brain, however, minimal or no virus replication  
314 was detected. In addition, the infectious particles were present in the axon of  
315 neurons in all four NHPs. Thirty-five infectious particles were observed in a single  
316 160 nm section of an axon. Taken together, these data strongly suggest that  
317 EEEV is able to rapidly spread throughout the CNS following aerosol challenge  
318 likely via axonal transport and warrants further investigation.

319 Many of the physiological parameters measured with advanced telemetry  
320 and 24-hr continuous monitoring were considerably altered following infection;  
321 temperature +3.0-4.2 °C, respiration rate +56-128%, activity -15-76%, +5-22%,  
322 heart rate +67-190%, systolic blood pressure +44-67%, diastolic blood pressure  
323 +45-80%, ECG abnormalities, reduction in food/fluid intake and sleep, and EEG  
324 waves -99-+6,800%. Many of these parameters are under the control of the  
325 autonomic nervous system (ANS). The master regulator of the ANS is the  
326 hypothalamus which is comprised of numerous important nuclei that regulate  
327 these parameters; preoptic area (temperature), suprachiasmatic nuclei (circadian  
328 rhythm), paraventricular nuclei and supraoptic nucleus (hunger/satiety),  
329 tuberomamillary nucleus and the perifornical lateral (sleep), arcuate nucleus and  
330 paraventricular nucleus (blood pressure), arcuate nucleus (cardiac electrical  
331 system and heart rate), paraventricular nucleus, perifornical area, and  
332 dorsomedial hypothalamus (respiration) [79-86]. The hypothalamic nuclei are  
333 interconnected with many other regulatory centers such as the thalamus, basal  
334 ganglia, medulla oblongata, and others to exert control on important physiological  
335 parameters. The histopathology, ISH, IHC, and TEM data from this study shows



336 the presence of viral RNA, proteins, and replication centers in the ANS control  
337 centers. These data suggest that EEEV infection in the brain likely produces  
338 disruption and/or dysregulation of the ANS control centers to produce rapid and  
339 extreme alterations in physiology and behavior to cause severe disease.

340 In many regions of the brain, EEEV infection produced minimal necrosis  
341 and inflammatory infiltrates, and majority of the cellular architecture remained  
342 intact. Accordingly, the neuronal necrosis and/or host inflammation cannot alone  
343 explain the fatal disease in the NHPs. One potential explanation of these results  
344 is that EEEV pathogenesis, in part, may be due to rapid local and global neuronal  
345 dysfunction. This hypothesis has been investigated for a prototypic encephalitic  
346 virus, rabies virus (RABV). RABV can exert neuronal dysfunction by multiple  
347 mechanisms. RABV infection in neurons can induce degeneration of axons and  
348 dendrites without inflammation or cell death, axonal swelling, generation of toxic  
349 metabolites such as reactive oxygen species, decreased expression of  
350 housekeeping genes, impairment of both the release and binding of serotonin,  
351 and reduction in expression of voltage-dependent sodium channels [87-94].  
352 Similar to RABV, the axonal transport of EEEV may also disrupt the transport of  
353 RNA, proteins, and/or organelles to produce neuronal dysfunction and leading to  
354 fatal outcomes. This hypothesis requires further investigation to elucidate the  
355 potential mechanism/s.

356 As described in our companion manuscript, NHP #1 experienced a critical  
357 cardiovascular event and was subsequently euthanized. The investigation of the  
358 cardiac tissue showed no evidence of viral induced pathology, RNA, proteins, or

359 host inflammatory response. In contrast, the brain tissues displayed some  
360 microscopic lesions as well as considerable presence of viral RNA and proteins,  
361 particularly in the hypothalamus and medulla oblongata. These data suggest  
362 EEEV infection of the ANS control centers may have led to the dysregulation  
363 and/or disruption of the heart's electrical activity leading to a critical cardiac  
364 event. Lastly, the electrolyte imbalance due to considerable decrease in  
365 food/fluid intake in the NHP prior to the cardiac event may also contribute to the  
366 disruption and dysfunction the heart's electrical activity.

367         There are several important implications of our EEEV study in regard to  
368 countermeasure development. First, the exposure by the aerosol route produces  
369 a rapid and profound infection of the CNS including the ANS control centers.  
370 Second, the axonal transport likely facilitates substantial neuron-to-neuron  
371 spread of virus. Third, the rapid viral spread in the CNS leads to considerable  
372 alterations of critical physiological parameters as early as ~12-36 hpi suggesting  
373 that the post-aerosol challenge window for therapeutic intervention may be very  
374 short in the NHP model. Fourth, the presence of infectious virus within axons and  
375 the subsequent potential spread via axonal transport demonstrate the necessity  
376 for targeting small molecule or antibody therapeutics inside the axons to  
377 prevent/reduce infection and transport. Fifth, the investigation of therapeutics and  
378 vaccines in an aerosol NHP model should include monitoring of brain waves and  
379 comprehensive brain pathology following challenge.

380         In summary, NHPs exhibited considerable alternation in many important  
381 physiological parameters within early as ~12 hpi following EEEV aerosol

382 challenge. EEEV initially replicated at olfactory bulb and was rapidly transported  
383 to distal parts of the brain likely utilizing axonal transport to facilitate neuron-to-  
384 neuron spread. Once within the CNS, the virus infected the ANS control centers  
385 to likely cause the disruption and/or dysregulation of critical physiological  
386 parameters leading to NHPs meeting the euthanasia criteria ~106-140 hpi. The  
387 lack of diffuse necrosis in the CNS and ANS suggests that EEEV pathogenesis is  
388 in part likely due to neuronal dysfunction and is an important parameter for the  
389 evaluation of countermeasure development.

390

## 391 **MATERIALS AND METHODS**

392 **Virus.** Eastern equine encephalitis virus isolate V105-00210 was obtained from  
393 internal USAMRIID collection. The details of the stock are described in our  
394 companion manuscript. Briefly, the virus stock was deep sequenced to verify  
395 genomic sequence and to ensure purity. In addition, the stock was tested to  
396 exclude presence of endotoxin and mycoplasma.

397 **Ethics Statement.** This work was supported by an approved USAMRIID IACUC  
398 animal research protocol. Research was conducted under an IACUC approved  
399 protocol in compliance with the Animal Welfare Act, PHS Policy, and other  
400 Federal statutes and regulations relating to animals and experiments involving  
401 animals. The facility where this research was conducted is accredited by the  
402 Association for Assessment and Accreditation of Laboratory Animal Care,  
403 International and adheres to principles stated in the Guide for the Care and Use  
404 of Laboratory Animals, National Research Council, 2011 [95].

405 **Non-human Primate Study Design.** Study design is detailed in our companion  
406 manuscript. Briefly, four [2 males (NHPs #1 and 4), 2 females (NHPs #2 and 3)]  
407 cynomolgus macaques (*Macaca fascicularis*) of Chinese origin were obtained  
408 from Covance and were challenged with a target dose of 7.0 log<sub>10</sub> PFU of EEEV  
409 via the aerosol route. Following challenge, all four NHPs exhibited severe  
410 disease and met the euthanasia criteria ~106-140 hpi. Lung, liver, spleen, kidney,  
411 heart, spinal cord, and brain tissues were collected from each NHP at the time of  
412 euthanasia. Tissues were fixed for >21 days in 10% neutral buffered formalin.

413 **Tissues Processing and Histopathology.** Tissue sections from various organs  
414 were generated (Supp. Table 1). NHP tissues were processed in a Tissue-Tek  
415 VIP-6 vacuum infiltration processor (Sakura Finetek USA, Torrance, CA) followed  
416 by paraffin embedding with a Tissue-Tek model TEC (Sakura). Sections were cut  
417 on a Leica model 2245 microtome at 4 μm, stained with hematoxylin and eosin  
418 (H&E) and coverslipped. Slides were examined by an ACVP diplomate veterinary  
419 pathologist blinded to intervention. All images were captured with a Leica  
420 DM3000 microscope and DFC 500 digital camera using Leica Application Suite  
421 version 4.10.0 (Leica Microsystems, Buffalo Grove, IL).

422 ***In Situ* Hybridization.** *In situ* hybridization (ISH) was performed using the  
423 RNAscope 2.5 HD RED kit (Advanced Cell Diagnostics, Newark, CA, USA)  
424 according to the manufacturer's instructions. Briefly, EEEV ISH probe targeting  
425 nucleotides 8680-9901 of EEEV isolate V105-00210 was designed and  
426 synthesized by Advanced Cell Diagnostics (Cat# 455721). Tissue sections were  
427 deparaffinized with Xyless II (Valtech, Brackenridge, PA, USA), followed by a

428 series of ethanol washes and peroxidase blocking, then heated in kit-provided  
429 antigen retrieval buffer, and digested by kit-provided proteinase. Sections were  
430 exposed to ISH target probe pairs and incubated at 40 °C in a hybridization oven  
431 for 2 h. After rinsing with wash buffer, ISH signal was amplified using kit-provided  
432 Pre-amplifier and Amplifier conjugated to alkaline phosphatase and incubated  
433 with Fast Red substrate solution for 10 mins at room temperature. Sections were  
434 then stained with hematoxylin, air-dried, and mounted. ISH images were  
435 collected using an Olympus BX53 upright microscope (Olympus Scientific  
436 Solutions Americas Corp., Waltham, MA, USA).

437 **Immunohistochemistry.** Immunohistochemistry (IHC) was performed using the  
438 Dako Envision system (Dako Agilent Pathology Solutions, Carpinteria, CA, USA).  
439 After deparaffinization and peroxidase blocking, sections were covered with  
440 Rabbit anti-alphavirus polyclonal antibody (USAMRIID) at a dilution of 1:5000  
441 and incubated at room temperature for 30 minutes. They were rinsed, and  
442 treated sequentially by an HRP-conjugated, secondary anti-rabbit polymer (Cat.  
443 #K4003, Dako Agilent Pathology Solutions). All slides were exposed to brown  
444 chromogenic substrate DAB (Cat. #K3468, Dako Agilent Pathology Solutions),  
445 counterstained with hematoxylin, dehydrated, cleared, and coverslipped. IHC  
446 images were collected using an Olympus BX53 upright microscope (Olympus  
447 Scientific Solutions Americas Corp., Waltham, MA, USA).

448 **Immunofluorescence Assay.** Formalin-fixed paraffin embedded (FFPE) tissue  
449 sections were deparaffinized using xylene and a series of ethanol washes. After  
450 0.1% Sudan black B (Sigma) treatment to eliminate the autofluorescence

451 background, the sections were heated in Tris-EDTA buffer (10mM Tris Base,  
452 1mM EDTA Solution, 0.05% Tween 20, pH 9.0) for 15 minutes to reverse  
453 formaldehyde crosslinks. After rinses with PBS (pH 7.4), the sections were  
454 blocked with PBS containing 5% normal goat serum overnight at 4°C. Then the  
455 sections were incubated with Rabbit anti-EEEV antibody (USAMRIID, 1:1000)  
456 and chicken anti-NeuN antibody (Abcam, 1:25), or chicken anti-GFAP (Abcam,  
457 1:500, or mouse anti-CD68 (Agilent/Dako, 1:200) for 2 hours at room  
458 temperature. After rinses with PBS, the sections were incubated with secondary  
459 goat anti-chick Alex Fluor 488 (green, 1:500), goat anti-rabbit Alex Flour 488  
460 (green), goat anti-rabbit Cy3 (red), and/ or goat anti-mouse Cy3 antibodies (red,  
461 1:500) for 1 hour at room temperature. Sections were cover slipped using the  
462 Vectashield mounting medium with DAPI (Vector Laboratories). Images were  
463 captured on an LSM 880 Confocal Microscope (Zeiss, Oberkochen, Germany)  
464 and processed using open-source ImageJ software (National Institutes of Health,  
465 Bethesda, MD, USA).

466 **Transmission Electron Microscopy.** Formalin-fixed thalamic tissue from each  
467 NHP was obtained and submerged in 2.5% glutaraldehyde and 2%  
468 paraformaldehyde in 0.1M sodium phosphate buffer for further fixation. Samples  
469 were fixed for at least 24 hours at 4°C and then rinsed with milliQ-EM grade  
470 water, rinsed again with 0.1M sodium cacodylate buffer before post-fixing with  
471 1% osmium tetroxide in 0.1M sodium cacodylate for 60 minutes. After osmium  
472 fixation, the samples were rinsed with 0.1M sodium cacodylate buffer, followed  
473 by a water wash then subjected to uranyl acetate *en bloc*. Samples were washed

474 with water then dehydrated through a graded ethanol series including 3  
475 exchanges with 100% ethanol. Samples were further dehydrated with equal  
476 volumes of 100% ethanol and propylene oxide followed by two changes of  
477 propylene oxide. Samples were initially infiltrated with equal volumes of  
478 propylene oxide and resin (Embed-812; EMS, Hatfield, PA, USA) then incubated  
479 overnight in propylene oxide and resin. The next day, the samples were infiltrated  
480 with 100% resin embedded and oriented in 100% resin and then allowed to  
481 polymerize for 48 hours at 60°C. 1 micron thick sections were cut from one  
482 tissue block and a region of interest for thin sectioning was chosen. 80nm thin  
483 sections were cut and collected on 200 mesh copper grids. Two grids from each  
484 sample was further contrast stained with 2% uranyl acetate and Reynold's lead  
485 citrate. Samples were then imaged on the Jeol 1011 TEM at various  
486 magnifications.

487

488

489 **Funding Information.** This study was supported by a grant from Medical  
490 Countermeasure Systems-Joint Vaccine Acquisition Program.

491

492 **Disclosure Statement.** The views expressed in this article are those of the  
493 authors and do not reflect the official policy or position of the U.S. Department of  
494 Defense, or the Department of the Army.

495

#### 496 **Author Contributions**

497 **Conceptualization:** Farooq Nasar, and Margaret L Pitt.

498 **Formal analysis:** Janice A Williams, Simon Y Long, Xiankun Zeng, John C  
499 Trefry, Sharon Daye, Paul R Facemire, Patrick L Iversen, Sina Bavari, Margaret  
500 L Pitt, and Farooq Nasar.

501 **Funding acquisition:** Farooq Nasar and Margaret L Pitt.

502 **Investigation:** Janice A Williams, Simon Y Long, Xiankun Zeng, John C Trefry,  
503 Sharon Daye, Sina Bavari, Margaret L Pitt, and Farooq Nasar.

504 **Methodology:** Janice A Williams, Simon Y Long, Xiankun Zeng, Kathleen Kuehl,  
505 April M Babka, Neil M Davis, Jun Liu, and Sharon Daye.

506 **Project administration:** Farooq Nasar, and Margaret L. Pitt.

507 **Supervision:** Farooq Nasar, Sina Bavari, and Margaret L. Pitt.

508 **Writing – original draft:** Janice A Williams, Simon Y Long, and Farooq Nasar.

509 **Writing – review & editing:** Janice A Williams, Simon Y Long, Xiankun Zeng,  
510 Kathleen Kuehl, April M Babka, Neil M Davis, Jun Liu, John C Trefry, Sharon  
511 Daye, Paul R Facemire, Patrick L Iversen, Sina Bavari, Margaret L Pitt, and



512 Farooq Nasar.

## 513 REFERENCES

514

- 515 1. Weston JH, Welsh MD, McLoughlin MF, Todd D. Salmon pancreas disease  
516 virus, an alphavirus infecting farmed Atlantic salmon, *Salmo salar* L. *Virology*.  
517 1999;256(2):188-95. doi: 10.1006/viro.1999.9654. PubMed PMID: 10191183.
- 518 2. Villoing S, Bearzotti M, Chilmonczyk S, Castric J, Bremont M. Rainbow trout  
519 sleeping disease virus is an atypical alphavirus. *J Virol*. 2000;74(1):173-83. PubMed  
520 PMID: 10590104; PubMed Central PMCID: PMCPMC111526.
- 521 3. Nasar F, Palacios G, Gorchakov RV, Guzman H, Da Rosa AP, Savji N, et al. Eilat  
522 virus, a unique alphavirus with host range restricted to insects by RNA replication. *Proc*  
523 *Natl Acad Sci U S A*. 2012;109(36):14622-7. doi: 10.1073/pnas.1204787109. PubMed  
524 PMID: 22908261; PubMed Central PMCID: PMCPMC3437828.
- 525 4. La Linn M, Gardner J, Warrilow D, Darnell GA, McMahon CR, Field I, et al.  
526 Arbovirus of marine mammals: a new alphavirus isolated from the elephant seal louse,  
527 *Lepidophthirus macrorhini*. *J Virol*. 2001;75(9):4103-9. doi: 10.1128/JVI.75.9.4103-  
528 4109.2001. PubMed PMID: 11287559; PubMed Central PMCID: PMCPMC114155.
- 529 5. Forrester NL, Palacios G, Tesh RB, Savji N, Guzman H, Sherman M, et al.  
530 Genome-scale phylogeny of the alphavirus genus suggests a marine origin. *J Virol*.  
531 2012;86(5):2729-38. doi: 10.1128/JVI.05591-11. PubMed PMID: 22190718; PubMed  
532 Central PMCID: PMCPMC3302268.
- 533 6. Fields BN, Knipe DM, Howley PM. *Fields virology*. 6th ed. Philadelphia: Wolters  
534 Kluwer Health/Lippincott Williams & Wilkins; 2013.
- 535 7. Lindsey NP, Staples JE, Fischer M. Eastern Equine Encephalitis Virus in the  
536 United States, 2003-2016. *Am J Trop Med Hyg*. 2018;98(5):1472-7. Epub 2018/03/21.  
537 doi: 10.4269/ajtmh.17-0927. PubMed PMID: 29557336; PubMed Central PMCID:  
538 PMCPMC5953388.
- 539 8. Ko SY, Akahata W, Yang ES, Kong WP, Burke CW, Honnold SP, et al. A virus-  
540 like particle vaccine prevents equine encephalitis virus infection in nonhuman primates.  
541 *Sci Transl Med*. 2019;11(492). Epub 2019/05/17. doi: 10.1126/scitranslmed.aav3113.  
542 PubMed PMID: 31092692.
- 543 9. Reed DS, Lackemeyer MG, Garza NL, Norris S, Gamble S, Sullivan LJ, et al.  
544 Severe encephalitis in cynomolgus macaques exposed to aerosolized Eastern equine  
545 encephalitis virus. *J Infect Dis*. 2007;196(3):441-50. doi: 10.1086/519391. PubMed  
546 PMID: 17597459.
- 547 10. Roy CJ, Adams AP, Wang E, Leal G, Seymour RL, Sivasubramani SK, et al. A  
548 chimeric Sindbis-based vaccine protects cynomolgus macaques against a lethal aerosol  
549 challenge of eastern equine encephalitis virus. *Vaccine*. 2013;31(11):1464-70. doi:  
550 10.1016/j.vaccine.2013.01.014. PubMed PMID: 23333212; PubMed Central PMCID:  
551 PMC3581708.
- 552 11. Porter AI, Erwin-Cohen RA, Twenhafel N, Chance T, Yee SB, Kern SJ, et al.  
553 Characterization and pathogenesis of aerosolized eastern equine encephalitis in the  
554 common marmoset (*Callithrix jacchus*). *Viol J*. 2017;14(1):25. Epub 2017/02/09. doi:  
555 10.1186/s12985-017-0687-7. PubMed PMID: 28173871; PubMed Central PMCID:  
556 PMCPMC5297202.

- 557 12. Phelps AL, O'Brien LM, Eastaugh LS, Davies C, Lever MS, Ennis J, et al.  
558 Aerosol infection of Balb/c mice with eastern equine encephalitis virus; susceptibility and  
559 lethality. *Virology*. 2019;16(1):2. Epub 2019/01/07. doi: 10.1186/s12985-018-1103-7.  
560 PubMed PMID: 30611287; PubMed Central PMCID: PMC6321726.
- 561 13. Honnold SP, Mossel EC, Bakken RR, Lind CM, Cohen JW, Eccleston LT, et al.  
562 Eastern equine encephalitis virus in mice II: pathogenesis is dependent on route of  
563 exposure. *Virology*. 2015;12:154. Epub 2015/10/02. doi: 10.1186/s12985-015-0385-2.  
564 PubMed PMID: 26423229; PubMed Central PMCID: PMC64589026.
- 565 14. Roy CJ, Reed DS, Wilhelmsen CL, Hartings J, Norris S, Steele KE. Pathogenesis  
566 of aerosolized Eastern Equine Encephalitis virus infection in guinea pigs. *Virology*.  
567 2009;6:170. doi: 10.1186/1743-422X-6-170. PubMed PMID: 19852817; PubMed Central  
568 PMCID: PMC2770496.
- 569 15. Andrews C, Gerdin J, Patterson J, Buckles EL, Fitzgerald SD. Eastern equine  
570 encephalitis in puppies in Michigan and New York states. *J Vet Diagn Invest*.  
571 2018;30(4):633-6. Epub 2018/05/03. doi: 10.1177/1040638718774616. PubMed PMID:  
572 29717641; PubMed Central PMCID: PMC6505920.
- 573 16. Bastian FO, Wende RD, Singer DB, Zeller RS. Eastern equine encephalomyelitis.  
574 Histopathologic and ultrastructural changes with isolation of the virus in a human case.  
575 *Am J Clin Pathol*. 1975;64(1):10-3. Epub 1975/07/01. doi: 10.1093/ajcp/64.1.10.  
576 PubMed PMID: 1171613.
- 577 17. Bauer RW, Gill MS, Poston RP, Kim DY. Naturally occurring eastern equine  
578 encephalitis in a Hampshire wether. *J Vet Diagn Invest*. 2005;17(3):281-5. Epub  
579 2005/06/11. doi: 10.1177/104063870501700314. PubMed PMID: 15945389.
- 580 18. Belle EA, Grant LS, Thorburn MJ. An Outbreak of Eastern Equine  
581 Encephalomyelitis in Jamaica. II. Laboratory Diagnosis and Pathology of Eastern Equine  
582 Encephalomyelitis in Jamaica. *Am J Trop Med Hyg*. 1964;13:335-41. Epub 1964/03/01.  
583 doi: 10.4269/ajtmh.1964.13.335. PubMed PMID: 14125889.
- 584 19. Berlin D, Gilani AI, Grewal AK, Fowkes M. Eastern equine encephalitis. *Pract*  
585 *Neurol*. 2017;17(5):387-91. Epub 2017/07/30. doi: 10.1136/practneurol-2017-001659.  
586 PubMed PMID: 28754695.
- 587 20. Chenier S, Cote G, Vanderstock J, Macieira S, Laperle A, Helie P. An eastern  
588 equine encephalomyelitis (EEE) outbreak in Quebec in the fall of 2008. *Can Vet J*.  
589 2010;51(9):1011-5. Epub 2010/12/02. PubMed PMID: 21119870; PubMed Central  
590 PMCID: PMC2920158.
- 591 21. Del Piero F, Wilkins PA, Dubovi EJ, Biolatti B, Cantile C. Clinical, pathologic,  
592 immunohistochemical, and virologic findings of eastern equine encephalomyelitis in two  
593 horses. *Vet Pathol*. 2001;38(4):451-6. Epub 2001/07/27. doi: 10.1354/vp.38-4-451.  
594 PubMed PMID: 11467481.
- 595 22. Deresiewicz RL, Thaler SJ, Hsu L, Zamani AA. Clinical and neuroradiographic  
596 manifestations of eastern equine encephalitis. *N Engl J Med*. 1997;336(26):1867-74.  
597 Epub 1997/06/26. doi: 10.1056/NEJM199706263362604. PubMed PMID: 9197215.
- 598 23. Elvinger F, Baldwin CA, Liggett AD, Tang KN, Dove CR. Protection of pigs by  
599 vaccination of pregnant sows against eastern equine encephalomyelitis virus. *Vet*  
600 *Microbiol*. 1996;51(3-4):229-39. Epub 1996/08/01. doi: 10.1016/0378-1135(96)00037-5.  
601 PubMed PMID: 8870186; PubMed Central PMCID: PMC67117144.

- 602 24. Elvinger F, Liggett AD, Tang KN, Harrison LR, Cole JR, Jr., Baldwin CA, et al.  
603 Eastern equine encephalomyelitis virus infection in swine. *J Am Vet Med Assoc.*  
604 1994;205(7):1014-6. Epub 1994/10/01. PubMed PMID: 7852154.
- 605 25. Ethier M, Rogg J. Eastern equine encephalitis: MRI findings in two patients. *Med*  
606 *Health R I.* 2012;95(7):227-9. Epub 2012/08/30. PubMed PMID: 22928238.
- 607 26. Farber S, Hill A, Connerly ML, Dingle JH. Encephalitis in infants and children -  
608 Caused by the virus of the eastern variety of equine encephalitis. *Journal of the American*  
609 *Medical Association.* 1940;114:1725-31. PubMed PMID: WOS:000201651800058.
- 610 27. Farrar MD, Miller DL, Baldwin CA, Stiver SL, Hall CL. Eastern equine  
611 encephalitis in dogs. *J Vet Diagn Invest.* 2005;17(6):614-7. Epub 2006/02/16. doi:  
612 10.1177/104063870501700619. PubMed PMID: 16475527.
- 613 28. Feemster RF. Outbreak of Encephalitis in Man Due to the Eastern Virus of  
614 Equine Encephalomyelitis. *Am J Public Health Nations Health.* 1938;28(12):1403-10.  
615 Epub 1938/12/01. doi: 10.2105/ajph.28.12.1403. PubMed PMID: 18014957; PubMed  
616 Central PMCID: PMCPMC1527806.
- 617 29. Garen PD, Tsai TF, Powers JM. Human eastern equine encephalitis:  
618 immunohistochemistry and ultrastructure. *Mod Pathol.* 1999;12(6):646-52. Epub  
619 1999/07/07. PubMed PMID: 10392642.
- 620 30. Gregory CR, Latimer KS, Niagro FD, Campagnoli RP, Steffens WL, Ritchie BW.  
621 Detection of eastern equine encephalomyelitis virus RNA in formalin-fixed, paraffin-  
622 embedded tissues using DNA in situ hybridization. *J Vet Diagn Invest.* 1996;8(2):151-5.  
623 Epub 1996/04/01. doi: 10.1177/104063879600800202. PubMed PMID: 8744734.
- 624 31. Harvala H, Bremner J, Kealey S, Weller B, McLellan S, Lloyd G, et al. Case  
625 report: Eastern equine encephalitis virus imported to the UK. *J Med Virol.*  
626 2009;81(2):305-8. Epub 2008/12/25. doi: 10.1002/jmv.21379. PubMed PMID:  
627 19107960.
- 628 32. Hirsch MS, DeMaria A, Jr., Schaefer PW, Branda JA. Case records of the  
629 Massachusetts General Hospital. Case 22-2008. A 52-year-old woman with fever and  
630 confusion. *N Engl J Med.* 2008;359(3):294-303. Epub 2008/07/19. doi:  
631 10.1056/NEJMcp0804149. PubMed PMID: 18635435.
- 632 33. Hrabak T, Yerkey MW, Callerame K, Graham K. Eastern equine encephalitis  
633 presenting as psychosis. *J Miss State Med Assoc.* 2002;43(4):109-10. Epub 2002/05/07.  
634 PubMed PMID: 11989192.
- 635 34. Jordan RA, Wagner JA, McCrumb FR. Eastern Equine Encephalitis: Report of a  
636 Case with Autopsy. *Am J Trop Med Hyg.* 1965;14:470-4. Epub 1965/05/01. doi:  
637 10.4269/ajtmh.1965.14.470. PubMed PMID: 14292755.
- 638 35. Kim AS, Austin SK, Gardner CL, Zuiani A, Reed DS, Trobaugh DW, et al.  
639 Protective antibodies against Eastern equine encephalitis virus bind to epitopes in  
640 domains A and B of the E2 glycoprotein. *Nat Microbiol.* 2019;4(1):187-97. Epub  
641 2018/11/21. doi: 10.1038/s41564-018-0286-4. PubMed PMID: 30455470; PubMed  
642 Central PMCID: PMCPMC6294662.
- 643 36. Kim JH, Booss J, Manuelidis EE, Duncan CC. Human eastern equine  
644 encephalitis. Electron microscopic study of a brain biopsy. *Am J Clin Pathol.*  
645 1985;84(2):223-7. Epub 1985/08/01. doi: 10.1093/ajcp/84.2.223. PubMed PMID:  
646 4025229.

- 647 37. Kiupel M, Fitzgerald SD, Pennick KE, Cooley TM, O'Brien DJ, Bolin SR, et al.  
648 Distribution of eastern equine encephalomyelitis viral protein and nucleic acid within  
649 central nervous tissue lesions in white-tailed deer (*Odocoileus virginianus*). *Vet Pathol*.  
650 2013;50(6):1058-62. Epub 2013/05/21. doi: 10.1177/0300985813488956. PubMed  
651 PMID: 23686767.
- 652 38. Lury KM, Castillo M. Eastern equine encephalitis: CT and MRI findings in one  
653 case. *Emerg Radiol*. 2004;11(1):46-8. Epub 2004/08/17. doi: 10.1007/s10140-004-0350-  
654 7. PubMed PMID: 15309665.
- 655 39. McGee ED, Littleton CH, Mapp JB, Brown RJ. Eastern equine encephalomyelitis  
656 in an adult cow. *Vet Pathol*. 1992;29(4):361-3. Epub 1992/07/01. doi:  
657 10.1177/030098589202900414. PubMed PMID: 1514224.
- 658 40. Morse RP, Bennish ML, Darras BT. Eastern equine encephalitis presenting with a  
659 focal brain lesion. *Pediatr Neurol*. 1992;8(6):473-5. Epub 1992/11/01. PubMed PMID:  
660 1476580.
- 661 41. Mukerji SS, Lam AD, Wilson MR. Eastern Equine Encephalitis Treated With  
662 Intravenous Immunoglobulins. *Neurohospitalist*. 2016;6(1):29-31. Epub 2016/01/08. doi:  
663 10.1177/1941874415578533. PubMed PMID: 26740855; PubMed Central PMCID:  
664 PMC4680893.
- 665 42. Nathanson N, Stolley PD, Boolukos PJ. Eastern equine encephalitis. Distribution  
666 of central nervous system lesions in man and Rhesus monkey. *J Comp Pathol*.  
667 1969;79(1):109-15. Epub 1969/01/01. doi: 10.1016/0021-9975(69)90034-6. PubMed  
668 PMID: 4975613.
- 669 43. Nickerson JP, Kannabiran S, Burbank HN. MRI findings in eastern equine  
670 encephalitis: the "parenthesis" sign. *Clin Imaging*. 2016;40(2):222-3. Epub 2016/03/21.  
671 doi: 10.1016/j.clinimag.2015.10.012. PubMed PMID: 26995574.
- 672 44. Nolen-Walston R, Bedenice D, Rodriguez C, Rushton S, Bright A, Fecteau ME,  
673 et al. Eastern equine encephalitis in 9 South American camelids. *J Vet Intern Med*.  
674 2007;21(4):846-52. Epub 2007/08/22. doi: 10.1892/0891-  
675 6640(2007)21[846:eeisa]2.0.co;2. PubMed PMID: 17708408.
- 676 45. Patterson JS, Maes RK, Mullaney TP, Benson CL. Immunohistochemical  
677 diagnosis of eastern equine encephalomyelitis. *J Vet Diagn Invest*. 1996;8(2):156-60.  
678 Epub 1996/04/01. doi: 10.1177/104063879600800203. PubMed PMID: 8744735.
- 679 46. Pennick KE, McKnight CA, Patterson JS, Latimer KS, Maes RK, Wise AG, et al.  
680 Diagnostic sensitivity and specificity of in situ hybridization and immunohistochemistry  
681 for Eastern equine encephalitis virus and West Nile virus in formalin-fixed, paraffin-  
682 embedded brain tissue of horses. *J Vet Diagn Invest*. 2012;24(2):333-8. Epub  
683 2012/03/02. doi: 10.1177/1040638711435230. PubMed PMID: 22379048.
- 684 47. Piliero PJ, Brody J, Zamani A, Deresiewicz RL. Eastern equine encephalitis  
685 presenting as focal neuroradiographic abnormalities: case report and review. *Clin Infect*  
686 *Dis*. 1994;18(6):985-8. Epub 1994/06/01. doi: 10.1093/clinids/18.6.985. PubMed PMID:  
687 8086564.
- 688 48. Poonacha KB, Gregory CR, Vickers ML. Intestinal lesions in a horse associated  
689 with eastern equine encephalomyelitis virus infection. *Vet Pathol*. 1998;35(6):535-8.  
690 Epub 1998/11/21. doi: 10.1177/030098589803500608. PubMed PMID: 9823595.
- 691 49. Pouch SM, Katugaha SB, Shieh WJ, Annambhotla P, Walker WL, Basavaraju  
692 SV, et al. Transmission of Eastern Equine Encephalitis Virus from an Organ Donor to

- 693 Three Transplant Recipients. *Clin Infect Dis*. 2018. Epub 2018/10/30. doi:  
694 10.1093/cid/ciy923. PubMed PMID: 30371754; PubMed Central PMCID:  
695 PMC6488434.
- 696 50. Przelomski MM, O'Rourke E, Grady GF, Berardi VP, Markley HG. Eastern  
697 equine encephalitis in Massachusetts: a report of 16 cases, 1970-1984. *Neurology*.  
698 1988;38(5):736-9. Epub 1988/05/01. doi: 10.1212/wnl.38.5.736. PubMed PMID:  
699 3362371.
- 700 51. Pursell AR, Mitchell FE, Seibold HR. Naturally occurring and experimentally  
701 induced eastern encephalomyelitis in calves. *J Am Vet Med Assoc*. 1976;169(10):1101-3.  
702 Epub 1976/11/15. PubMed PMID: 977441.
- 703 52. Pursell AR, Peckham JC, Cole JR, Jr., Stewart WC, Mitchell FE. Naturally  
704 occurring and artificially induced eastern encephalomyelitis in pigs. *J Am Vet Med*  
705 *Assoc*. 1972;161(10):1143-7. Epub 1972/11/15. PubMed PMID: 4652365.
- 706 53. Schmitt SM, Cooley TM, Fitzgerald SD, Bolin SR, Lim A, Schaefer SM, et al. An  
707 outbreak of Eastern equine encephalitis virus in free-ranging white-tailed deer in  
708 Michigan. *J Wildl Dis*. 2007;43(4):635-44. Epub 2007/11/07. doi: 10.7589/0090-3558-  
709 43.4.635. PubMed PMID: 17984258.
- 710 54. Shah KJ, Cherabuddi K. Case of eastern equine encephalitis presenting in winter.  
711 *BMJ Case Rep*. 2016;2016. Epub 2016/05/12. doi: 10.1136/bcr-2016-215270. PubMed  
712 PMID: 27165999; PubMed Central PMCID: PMC6488434.
- 713 55. Silverman MA, Misasi J, Smole S, Feldman HA, Cohen AB, Santagata S, et al.  
714 Eastern equine encephalitis in children, Massachusetts and New Hampshire, USA, 1970-  
715 2010. *Emerg Infect Dis*. 2013;19(2):194-201; quiz 352. Epub 2013/01/25. doi:  
716 10.3201/eid1902.120039. PubMed PMID: 23343480; PubMed Central PMCID:  
717 PMC6488434.
- 718 56. Solomon IH, Ciarlini P, Santagata S, Ahmed AA, De Girolami U, Prasad S, et al.  
719 Fatal Eastern Equine Encephalitis in a Patient on Maintenance Rituximab: A Case  
720 Report. *Open Forum Infect Dis*. 2017;4(1):ofx021. Epub 2017/05/10. doi:  
721 10.1093/ofid/ofx021. PubMed PMID: 28480291; PubMed Central PMCID:  
722 PMC6488434.
- 723 57. Tate CM, Howerth EW, Stallknecht DE, Allison AB, Fischer JR, Mead DG.  
724 Eastern equine encephalitis in a free-ranging white-tailed deer (*Odocoileus virginianus*). *J*  
725 *Wildl Dis*. 2005;41(1):241-5. Epub 2005/04/14. doi: 10.7589/0090-3558-41.1.241.  
726 PubMed PMID: 15827230.
- 727 58. Vogel P, Kell WM, Fritz DL, Parker MD, Schoepp RJ. Early events in the  
728 pathogenesis of eastern equine encephalitis virus in mice. *Am J Pathol*. 2005;166(1):159-  
729 71. Epub 2005/01/06. doi: 10.1016/S0002-9440(10)62241-9. PubMed PMID: 15632009;  
730 PubMed Central PMCID: PMC6488434.
- 731 59. Adams AP, Aronson JF, Tardif SD, Patterson JL, Brasky KM, Geiger R, et al.  
732 Common marmosets (*Callithrix jacchus*) as a nonhuman primate model to assess the  
733 virulence of eastern equine encephalitis virus strains. *J Virol*. 2008;82(18):9035-42. Epub  
734 2008/07/11. doi: 10.1128/JVI.00674-08. PubMed PMID: 18614636; PubMed Central  
735 PMCID: PMC6488434.
- 736 60. Hurst EW. Infection of the rhesus monkey (*Macaca mulatta*) and the guinea-pig  
737 with the virus of equine encephalomyelitis. *The Journal of Pathology and Bacteriology*.  
738 1936;42(1):271-302. doi: 10.1002/path.1700420128.

- 739 61. Jungherr EL, Helmboldt CF, Satriano SF, Luginbuhl RE. Investigation of eastern  
740 equine encephalomyelitis. III. Pathology in pheasants and incidental observations in feral  
741 birds. *Am J Hyg.* 1958;67(1):10-20. Epub 1958/01/01. PubMed PMID: 13508649.
- 742 62. King LS. Studies on Eastern Equine Encephalomyelitis : Ii. Pathogenesis of the  
743 Disease in the Guinea Pig. *J Exp Med.* 1939;69(5):675-90. Epub 1939/04/30. doi:  
744 10.1084/jem.69.5.675. PubMed PMID: 19870870; PubMed Central PMCID:  
745 PMCPMC2133754.
- 746 63. King LS. Studies on Eastern Equine Encephalomyelitis : V. Histopathology in the  
747 Mouse. *J Exp Med.* 1940;71(1):107-12. Epub 1940/01/01. doi: 10.1084/jem.71.1.107.  
748 PubMed PMID: 19870938; PubMed Central PMCID: PMCPMC2134999.
- 749 64. Ognianov D, Fernandez A. [Studies on the pathogenesis of eastern equine  
750 encephalomyelitis (EEE) in the mouse after injections of virus]. *Zentralbl Veterinarmed*  
751 *B.* 1972;19(2):89-93. Epub 1972/02/01. PubMed PMID: 5050029.
- 752 65. Paessler S, Aguilar P, Anishchenko M, Wang HQ, Aronson J, Campbell G, et al.  
753 The hamster as an animal model for eastern equine encephalitis--and its use in studies of  
754 virus entrance into the brain. *J Infect Dis.* 2004;189(11):2072-6. Epub 2004/05/15. doi:  
755 10.1086/383246. PubMed PMID: 15143475.
- 756 66. Wendell LC, Potter NS, Roth JL, Salloway SP, Thompson BB. Successful  
757 management of severe neuroinvasive eastern equine encephalitis. *Neurocrit Care.*  
758 2013;19(1):111-5. Epub 2013/06/05. doi: 10.1007/s12028-013-9822-5. PubMed PMID:  
759 23733173.
- 760 67. Murphy FA, Whitfield SG. Eastern equine encephalitis virus infection: electron  
761 microscopic studies of mouse central nervous system. *Exp Mol Pathol.* 1970;13(2):131-  
762 46. Epub 1970/10/01. doi: 10.1016/0014-4800(70)90001-8. PubMed PMID: 5470808.
- 763 68. Zhang R, Hryc CF, Cong Y, Liu X, Jakana J, Gorchakov R, et al. 4.4 A cryo-EM  
764 structure of an enveloped alphavirus Venezuelan equine encephalitis virus. *EMBO J.*  
765 2011;30(18):3854-63. Epub 2011/08/11. doi: 10.1038/emboj.2011.261. PubMed PMID:  
766 21829169; PubMed Central PMCID: PMCPMC3173789.
- 767 69. Sherman MB, Weaver SC. Structure of the recombinant alphavirus Western  
768 equine encephalitis virus revealed by cryoelectron microscopy. *J Virol.*  
769 2010;84(19):9775-82. Epub 2010/07/16. doi: 10.1128/JVI.00876-10. PubMed PMID:  
770 20631130; PubMed Central PMCID: PMCPMC2937749.
- 771 70. Chen L, Wang M, Zhu D, Sun Z, Ma J, Wang J, et al. Implication for alphavirus  
772 host-cell entry and assembly indicated by a 3.5A resolution cryo-EM structure. *Nat*  
773 *Commun.* 2018;9(1):5326. Epub 2018/12/16. doi: 10.1038/s41467-018-07704-x. PubMed  
774 PMID: 30552337; PubMed Central PMCID: PMCPMC6294011.
- 775 71. Kostyuchenko VA, Jakana J, Liu X, Haddow AD, Aung M, Weaver SC, et al. The  
776 structure of barmah forest virus as revealed by cryo-electron microscopy at a 6-angstrom  
777 resolution has detailed transmembrane protein architecture and interactions. *J Virol.*  
778 2011;85(18):9327-33. Epub 2011/07/15. doi: 10.1128/JVI.05015-11. PubMed PMID:  
779 21752915; PubMed Central PMCID: PMCPMC3165765.
- 780 72. Boonstra H, Oosterhuis JW, Oosterhuis AM, Fleuren GJ. Cervical tissue  
781 shrinkage by formaldehyde fixation, paraffin wax embedding, section cutting and  
782 mounting. *Virchows Arch A Pathol Anat Histopathol.* 1983;402(2):195-201. Epub  
783 1983/01/01. doi: 10.1007/BF00695061. PubMed PMID: 6420986.

- 784 73. Luft JH. Embedding Media — Old and New. *Advanced Techniques in Biological*  
785 *Electron Microscopy* 1973. p. 1-34.
- 786 74. Crang RFE, Klomparens KL. *Artifacts in Biological Electron Microscopy*:  
787 Springer; 1988.
- 788 75. Maday S, Twelvetrees AE, Moughamian AJ, Holzbaur EL. Axonal transport:  
789 cargo-specific mechanisms of motility and regulation. *Neuron*. 2014;84(2):292-309.  
790 Epub 2014/11/07. doi: 10.1016/j.neuron.2014.10.019. PubMed PMID: 25374356;  
791 PubMed Central PMCID: PMC4269290.
- 792 76. Monath TP, Cropp CB, Harrison AK. Mode of entry of a neurotropic arbovirus  
793 into the central nervous system. Reinvestigation of an old controversy. *Lab Invest*.  
794 1983;48(4):399-410. Epub 1983/04/01. PubMed PMID: 6300550.
- 795 77. Bauer A, Nolden T, Schroter J, Romer-Oberdorfer A, Gluska S, Perlson E, et al.  
796 Anterograde glycoprotein-dependent transport of newly generated rabies virus in dorsal  
797 root ganglion neurons. *J Virol*. 2014;88(24):14172-83. Epub 2014/10/03. doi:  
798 10.1128/JVI.02254-14. PubMed PMID: 25275124; PubMed Central PMCID:  
799 PMC4249153.
- 800 78. Samuel MA, Wang H, Siddharthan V, Morrey JD, Diamond MS. Axonal  
801 transport mediates West Nile virus entry into the central nervous system and induces  
802 acute flaccid paralysis. *Proc Natl Acad Sci U S A*. 2007;104(43):17140-5. Epub  
803 2007/10/18. doi: 10.1073/pnas.0705837104. PubMed PMID: 17939996; PubMed Central  
804 PMCID: PMC2040476.
- 805 79. Qin C, Li J, Tang K. The Paraventricular Nucleus of the Hypothalamus:  
806 Development, Function, and Human Diseases. *Endocrinology*. 2018;159(9):3458-72.  
807 Epub 2018/07/28. doi: 10.1210/en.2018-00453. PubMed PMID: 30052854.
- 808 80. Lozic M, Sarenac O, Murphy D, Japundzic-Zigon N. Vasopressin, Central  
809 Autonomic Control and Blood Pressure Regulation. *Curr Hypertens Rep*. 2018;20(2):11.  
810 Epub 2018/02/27. doi: 10.1007/s11906-018-0811-0. PubMed PMID: 29480411.
- 811 81. Herzog ED, Hermanstyne T, Smyllie NJ, Hastings MH. Regulating the  
812 Suprachiasmatic Nucleus (SCN) Circadian Clockwork: Interplay between Cell-  
813 Autonomous and Circuit-Level Mechanisms. *Cold Spring Harb Perspect Biol*. 2017;9(1).  
814 Epub 2017/01/05. doi: 10.1101/cshperspect.a027706. PubMed PMID: 28049647;  
815 PubMed Central PMCID: PMC45204321.
- 816 82. Szymusiak R, McGinty D. Hypothalamic regulation of sleep and arousal. *Ann N*  
817 *Y Acad Sci*. 2008;1129:275-86. Epub 2008/07/02. doi: 10.1196/annals.1417.027.  
818 PubMed PMID: 18591488.
- 819 83. Fukushi I, Yokota S, Okada Y. The role of the hypothalamus in modulation of  
820 respiration. *Respir Physiol Neurobiol*. 2019;265:172-9. Epub 2018/07/17. doi:  
821 10.1016/j.resp.2018.07.003. PubMed PMID: 30009993.
- 822 84. Rahmouni K. Cardiovascular Regulation by the Arcuate Nucleus of the  
823 Hypothalamus: Neurocircuitry and Signaling Systems. *Hypertension*. 2016;67(6):1064-  
824 71. Epub 2016/04/06. doi: 10.1161/HYPERTENSIONAHA.115.06425. PubMed PMID:  
825 27045026; PubMed Central PMCID: PMC4865428.
- 826 85. Zimmerman CA, Leib DE, Knight ZA. Neural circuits underlying thirst and fluid  
827 homeostasis. *Nat Rev Neurosci*. 2017;18(8):459-69. Epub 2017/06/24. doi:  
828 10.1038/nrn.2017.71. PubMed PMID: 28638120; PubMed Central PMCID:  
829 PMC45955721.



- 830 86. Tan CL, Knight ZA. Regulation of Body Temperature by the Nervous System.  
831 Neuron. 2018;98(1):31-48. Epub 2018/04/06. doi: 10.1016/j.neuron.2018.02.022.  
832 PubMed PMID: 29621489; PubMed Central PMCID: PMC6034117.
- 833 87. Fu ZF, Weihe E, Zheng YM, Schafer MK, Sheng H, Corisdeo S, et al.  
834 Differential effects of rabies and borna disease viruses on immediate-early- and late-  
835 response gene expression in brain tissues. J Virol. 1993;67(11):6674-81. Epub  
836 1993/11/01. PubMed PMID: 8411369; PubMed Central PMCID: PMC6034117.
- 837 88. Tsiang H. Neuronal function impairment in rabies-infected rat brain. J Gen Virol.  
838 1982;61 (Pt 2):277-81. Epub 1982/08/01. doi: 10.1099/0022-1317-61-2-277. PubMed  
839 PMID: 7119753.
- 840 89. Bouzamondo E, Ladogana A, Tsiang H. Alteration of potassium-evoked 5-HT  
841 release from virus-infected rat cortical synaptosomes. Neuroreport. 1993;4(5):555-8.  
842 Epub 1993/05/01. doi: 10.1097/00001756-199305000-00023. PubMed PMID: 8513137.
- 843 90. Ceccaldi PE, Fillion MP, Ermine A, Tsiang H, Fillion G. Rabies virus selectively  
844 alters 5-HT1 receptor subtypes in rat brain. Eur J Pharmacol. 1993;245(2):129-38. Epub  
845 1993/04/15. doi: 10.1016/0922-4106(93)90120-x. PubMed PMID: 8491253.
- 846 91. Iwata M, Unno T, Minamoto N, Ohashi H, Komori S. Rabies virus infection  
847 prevents the modulation by alpha(2)-adrenoceptors, but not muscarinic receptors, of  
848 Ca(2+) channels in NG108-15 cells. Eur J Pharmacol. 2000;404(1-2):79-88. Epub  
849 2000/09/12. doi: 10.1016/s0014-2999(00)00621-x. PubMed PMID: 10980265.
- 850 92. Iwata M, Komori S, Unno T, Minamoto N, Ohashi H. Modification of membrane  
851 currents in mouse neuroblastoma cells following infection with rabies virus. Br J  
852 Pharmacol. 1999;126(8):1691-8. Epub 1999/06/18. doi: 10.1038/sj.bjp.0702473. PubMed  
853 PMID: 10372810; PubMed Central PMCID: PMC6034117.
- 854 93. Scott CA, Rossiter JP, Andrew RD, Jackson AC. Structural abnormalities in  
855 neurons are sufficient to explain the clinical disease and fatal outcome of experimental  
856 rabies in yellow fluorescent protein-expressing transgenic mice. J Virol. 2008;82(1):513-  
857 21. Epub 2007/10/19. doi: 10.1128/JVI.01677-07. PubMed PMID: 17942540; PubMed  
858 Central PMCID: PMC6034117.
- 859 94. Sundaramoorthy V, Green D, Locke K, O'Brien CM, Dearnley M, Bingham J.  
860 Novel role of SARM1 mediated axonal degeneration in the pathogenesis of rabies. PLoS  
861 Pathog. 2020;16(2):e1008343. Epub 2020/02/19. doi: 10.1371/journal.ppat.1008343.  
862 PubMed PMID: 32069324; PubMed Central PMCID: PMC6034117.
- 863 95. National Research Council (U.S.). Committee for the Update of the Guide for the  
864 Care and Use of Laboratory Animals., Institute for Laboratory Animal Research (U.S.),  
865 National Academies Press (U.S.). Guide for the care and use of laboratory animals. 8th  
866 ed. Washington, D.C.: National Academies Press; 2011. xxv, 220 p. p.  
867  
868  
869  
870  
871  
872  
873  
874  
875  
876

877 **Figure Legend**

878

879 **Figure 1.** Histopathology in the visceral organs of EEEV infected cynomolgus  
880 macaques. The tissues were collected at the time of euthanasia. Hematoxylin  
881 and eosin (H&E) staining was performed on the tissues of all four NHPs. Bar =  
882 200 um.

883

884 **Figure 2.** Pathology in the amygdala and the hippocampus of EEEV infected  
885 cynomolgus macaques. The tissues were collected at the time of euthanasia.  
886 Hematoxylin and eosin (H&E) staining was performed to visualize histopathology.  
887 The presence of EEEV RNA and proteins was visualized via *in situ* hybridization  
888 (ISH) and immunohistochemistry (IHC), respectively. H&E, ISH, and IHC were  
889 performed on the tissues of all four NHPs. Bar = 100 um (H&E and IHC). Bar =  
890 50 um (ISH).

891

892 **Figure 3.** Pathology in the hypothalamus of EEEV infected cynomolgus  
893 macaques. The tissue was collected at the time of euthanasia. Hematoxylin and  
894 eosin (H&E) staining was performed to visualize histopathology. The presence of  
895 EEEV RNA and proteins was visualized via *in situ* hybridization (ISH) and  
896 immunohistochemistry (IHC), respectively. H&E, ISH, and IHC were performed  
897 on the tissues of all four NHPs. Bar = 100 um (H&E and IHC). Bar = 50 um (ISH).

898

899 **Figure 4.** Histopathology in various parts of the brain tissues of EEEV infected  
900 cynomolgus macaques. The tissues were collected at the time of euthanasia.  
901 Hematoxylin and eosin (H&E) staining was performed to visualize histopathology.  
902 H&E was performed on the tissues of all four NHPs. Bar = 100 um.

903

904 **Figure 5.** The presence of EEEV RNA in various parts of the brain tissues of  
905 infected cynomolgus macaques. The tissues were collected at the time of  
906 euthanasia. The presence of viral RNA was visualized via *in situ* hybridization  
907 (ISH). ISH was performed on the tissues of all four NHPs. Bar = 50 um.

908

909 **Figure 6.** The presence of EEEV proteins in various parts of the brain tissues of  
910 infected cynomolgus macaques. The tissues were collected at the time of  
911 euthanasia. The presence of viral proteins was visualized via  
912 immunohistochemistry (IHC). IHC was performed on the tissues of all four NHPs.  
913 Bar = 100 um.

914

915 **Figure 7.** Histopathology in various parts of the spinal cord of EEEV infected  
916 cynomolgus macaques. The tissues were collected at the time of euthanasia.  
917 Hematoxylin and eosin (H&E) staining was performed to visualize histopathology.  
918 H&E was performed on the tissues of all four NHPs. Bar = 100 um.

919

920 **Figure 8.** The presence of EEEV RNA in various parts of the spinal cord of  
921 infected cynomolgus macaques. The tissues were collected at the time of

922 euthanasia. The presence of viral RNA was visualized via *in situ* hybridization  
923 (ISH). ISH was performed on the tissues of all four NHPs. Bar = 50 um.

924

925 **Figure 9.** The presence of EEEV proteins in various parts of the spinal cord of  
926 infected cynomolgus macaques. The tissues were collected at the time of  
927 euthanasia. The presence of viral proteins was visualized via  
928 immunohistochemistry (IHC). IHC was performed on the tissues of all four NHPs.  
929 Bar = 100 um.

930

931 **Figure 10.** The presence of EEEV RNA in the astrocytes of infected cynomolgus  
932 macaques. Sections from the thalamus of each NHP were visualized via  
933 immunofluorescence assay. Sections were stained for GFAP (green), EEEV  
934 (red), and DAPI (blue).

935

936 **Figure 11.** The presence of EEEV RNA in the microglia of infected cynomolgus  
937 macaques. Sections from the thalamus of each NHP were visualized via  
938 immunofluorescence assay. Sections were stained for CD68 (green), EEEV  
939 (red), and DAPI (blue).

940

941 **Figure 12.** The presence of EEEV RNA in the neurons of infected cynomolgus  
942 macaques. Sections from the thalamus of each NHP were visualized via  
943 immunofluorescence assay. Sections were stained for NeuN (green), EEEV  
944 (red), and DAPI (blue).

945

946 **Figure 13.** The extracellular distribution of EEEV virions in the thalamus of  
947 infected cynomolgus macaques. Sections from each NHP were examined and  
948 representative micrographs from each NHP are shown. Red arrows indicate virus  
949 particles. Bar = 200 nm.

950

951 **Figure 14.** The size of extracellular EEEV virions via transmission electron  
952 microscopy (TEM). Sections from the thalamus of each NHP were examined and  
953 representative micrographs from NHPs are shown. Red arrow indicates virus  
954 particles.

955

956 **Figure 15.** The localization of EEEV virions around the myelin sheath of neurons  
957 via transmission electron microscopy (TEM). Sections from the thalamus of each  
958 NHP were examined and representative micrographs from each NHP are shown.  
959 Red arrows indicate virus particles.

960

961 **Figure 16.** The localization of EEEV virions within the axons of neurons via  
962 transmission electron microscopy (TEM). Sections from the thalamus of each  
963 NHP were examined and representative micrographs of each NHP are shown.  
964 Red arrows highlight virus particles. Bar = 200 nm.

965

966 **Figure 17.** The localization of EEEV virions within an axon of a neuron via  
967 transmission electron microscopy (TEM). Sections from the thalamus of NHP #3

968 were examined. Two sequential sections, ~80 nm apart, of an axon are shown.  
969 Red arrows indicate virus particles. Scale bar = 100 nm.

970

971 **Figure 18.** The detection of cytopathic vacuoles in the cytoplasm of EEEV  
972 infected cells via transmission electron microscopy (TEM). Sections from the  
973 thalamus of infected NHPs were examined. Micrographs of NHP #4 are shown.  
974 Scale bars: Panels A and B = 600 nm, C and D = 400 nm, E, F and G = 200 nm,  
975 and H = 100 nm.

976

977 **Figure 19.** The detection of cytopathic vacuoles, nucleocapsid, and budding  
978 virions in EEEV infected cells via transmission electron microscopy (TEM). Blue  
979 and red arrows indicate nucleocapsid and virus particles, respectively. Sections  
980 from the thalamus of infected NHP #3 were examined. Scale bars: A = 200 nm, B  
981 = 100 nm.

982

983 **Figure 20.** The detection of EEEV particles enclosed within vesicles via  
984 transmission electron microscopy (TEM). Sections from the thalamus of infected  
985 NHPs were examined and representative micrographs are shown. Red arrows  
986 indicate virus particles. Scale bar = 100 nm.

987

988 **Figure 21.** The detection of necrotic lesions in the thalamus of NHP #1 via  
989 transmission electron microscopy (TEM). Red arrows indicate virus particles.  
990 Scale bars: A = 400 nm, B = 200 nm, C = 100 nm.

991

992 **Figure 22.** Proposed model of EEEV dissemination in the central nervous  
993 system (CNS) following an aerosol infection in cynomolgus macaques.

994

995 **Supp. Figure 1.** The absence of EEEV RNA in visceral organs of infected  
996 cynomolgus macaques. The tissues were collected at the time of euthanasia.  
997 The presence of viral RNA was visualized via *in situ* hybridization (ISH). ISH was  
998 performed on the tissues of all four NHPs. Bar = 200  $\mu$ m.

999

1000 **Supp. Figure 2.** The absence of EEEV proteins in visceral organs of infected  
1001 cynomolgus macaques. The tissues were collected at the time of euthanasia.  
1002 The presence of viral proteins was visualized via immunohistochemistry (IHC).  
1003 IHC was performed on the tissues of all four NHPs. Bar = 200  $\mu$ m.

1004

1005 **Supp. Figure 3.** The extracellular distribution of EEEV virions in the thalamus of  
1006 infected cynomolgus macaques. Sections from NHPs were examined via  
1007 transmission electron microscopy (TEM). Representative micrographs from each  
1008 NHP are shown.

1009

1010 **Supp. Figure 4.** The localization of EEEV virions near synapses via transmission  
1011 electron microscopy (TEM). Sections from the thalamus of each NHP were  
1012 examined and representative micrographs from each NHP are shown. NHP #1

1013 (A), NHP #2 (B), NHP #3 (C), and NHP #4 (D). Blue and red arrows show  
1014 synapses and infectious virus particles, respectively. Bar = 600 nm.

1015

1016

1017 **Supp. Figure 5.** Transmission electron microscopy (TEM) micrographs of viral  
1018 replication centers within the brain of non-human primates. Top panels are  
1019 representative electron micrographs of viral replication center (red asterisk)  
1020 visible within the thalamus (A, E), amygdala (B, F), hippocampus (C, G) and  
1021 hypothalamus (D, H) of a female non-human primate. The lower panels are also  
1022 representative micrographs of the replication center in a male non-human  
1023 primate. The number, size and intracellular localization of the replication center  
1024 varies. A and F scale bar = 500 nm. B-E, G and H scale bar = 1  $\mu$ m.

1025

1026 **Supp. Table 1.** List of tissue sections from each organ.

1027

# Figure 1

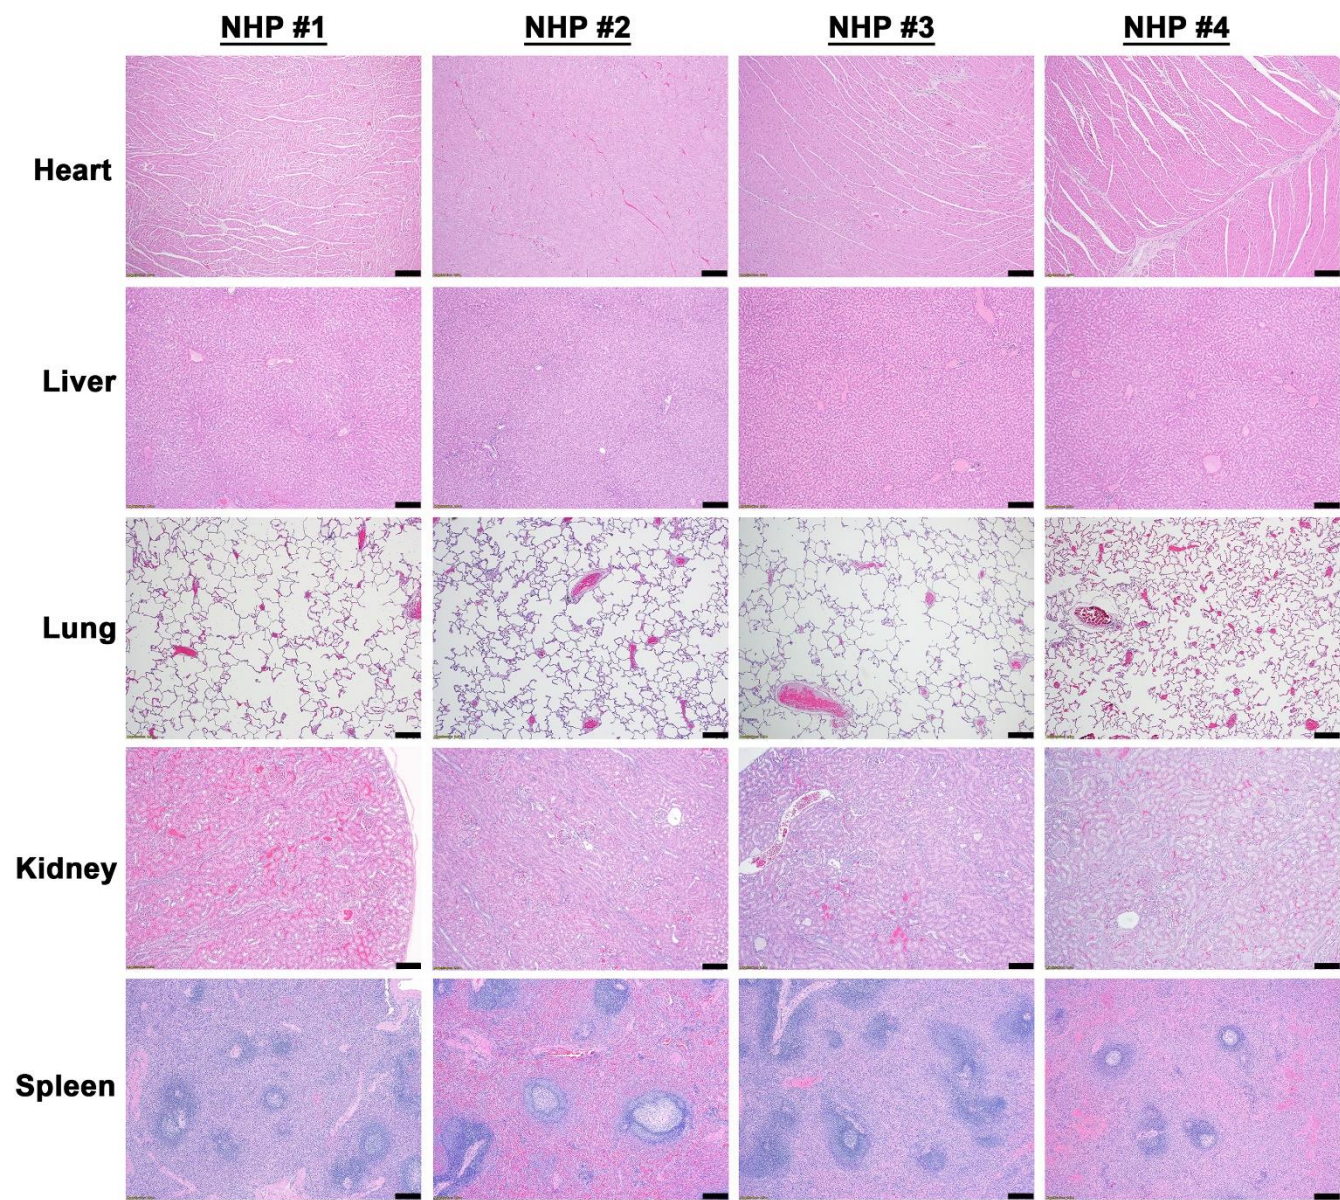

# Figure 2

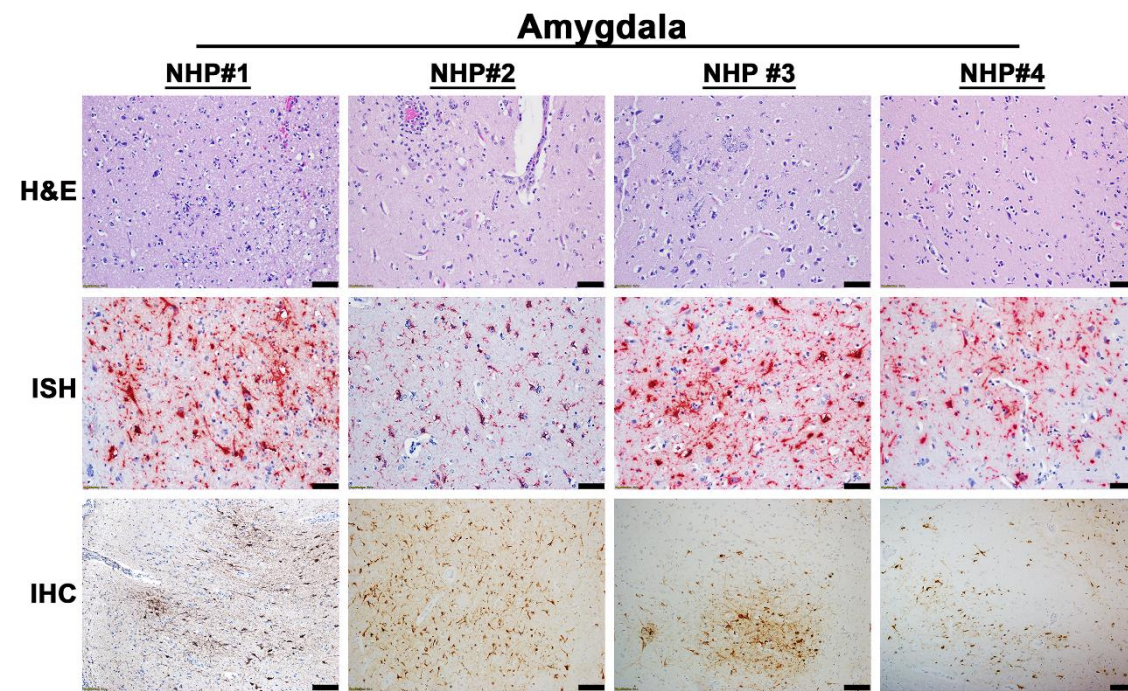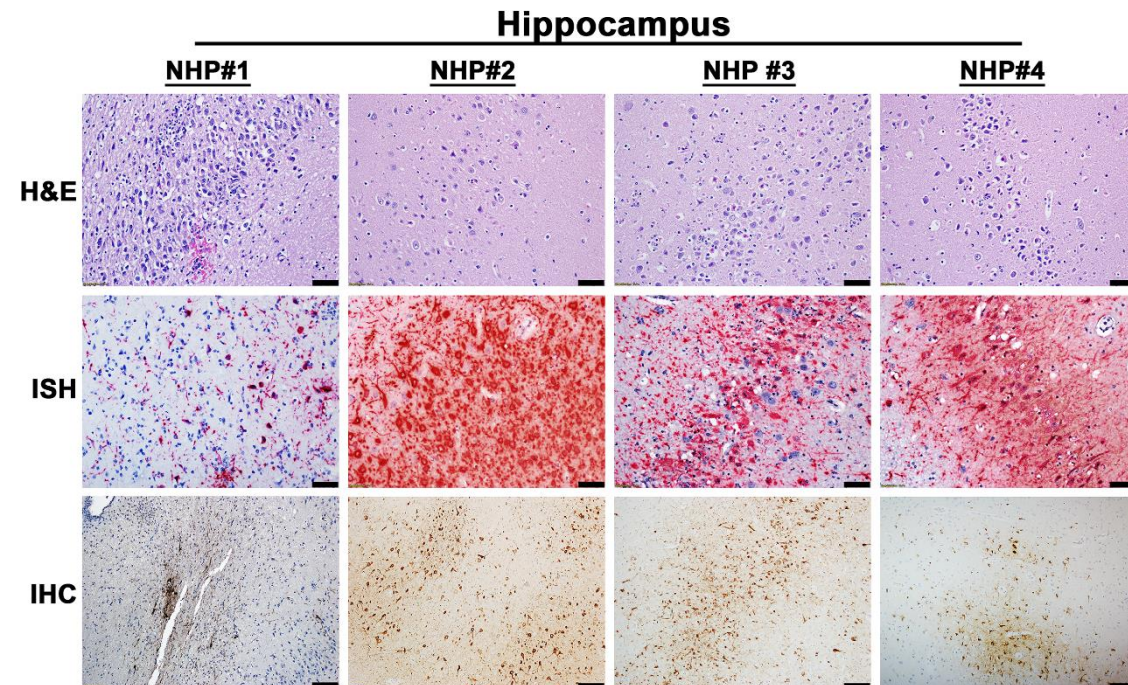

# Figure 3

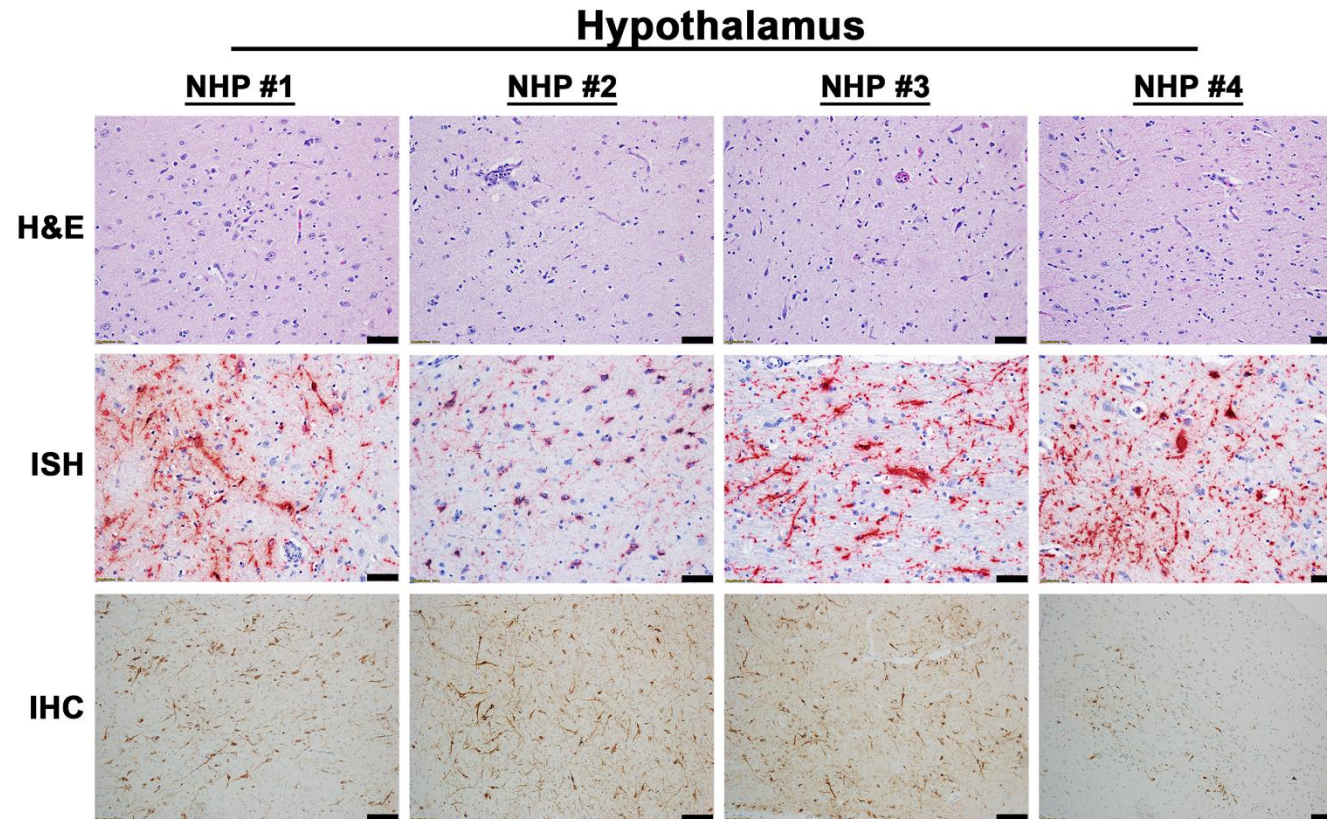



# Figure 4

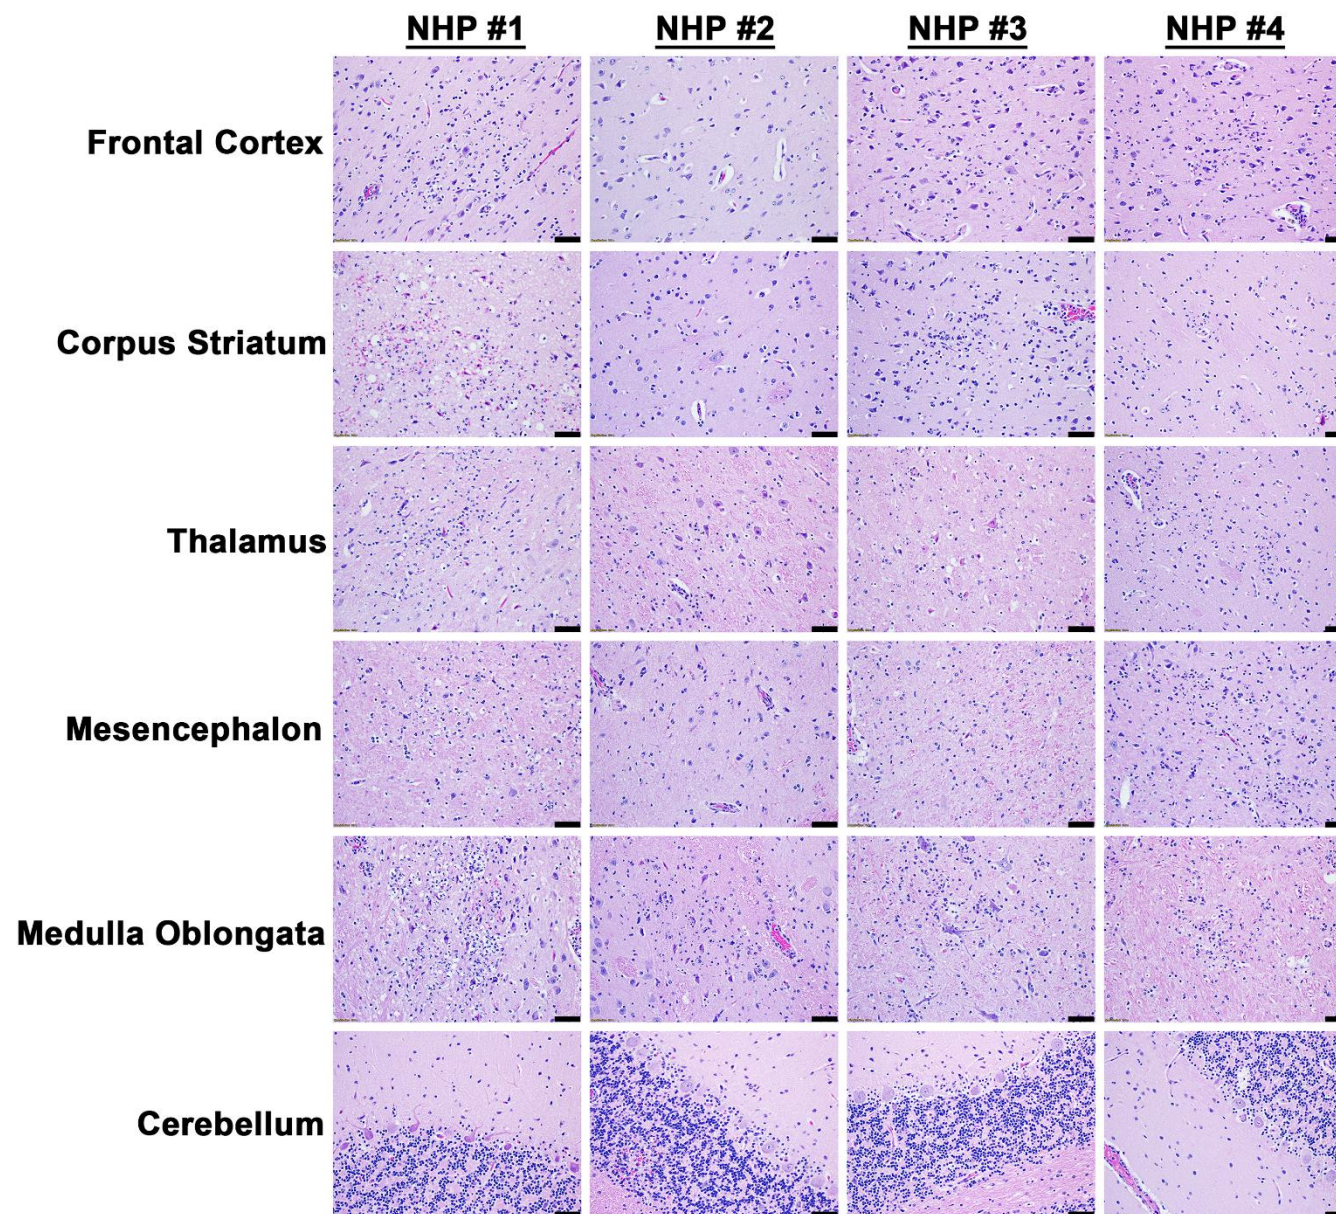

# Figure 5

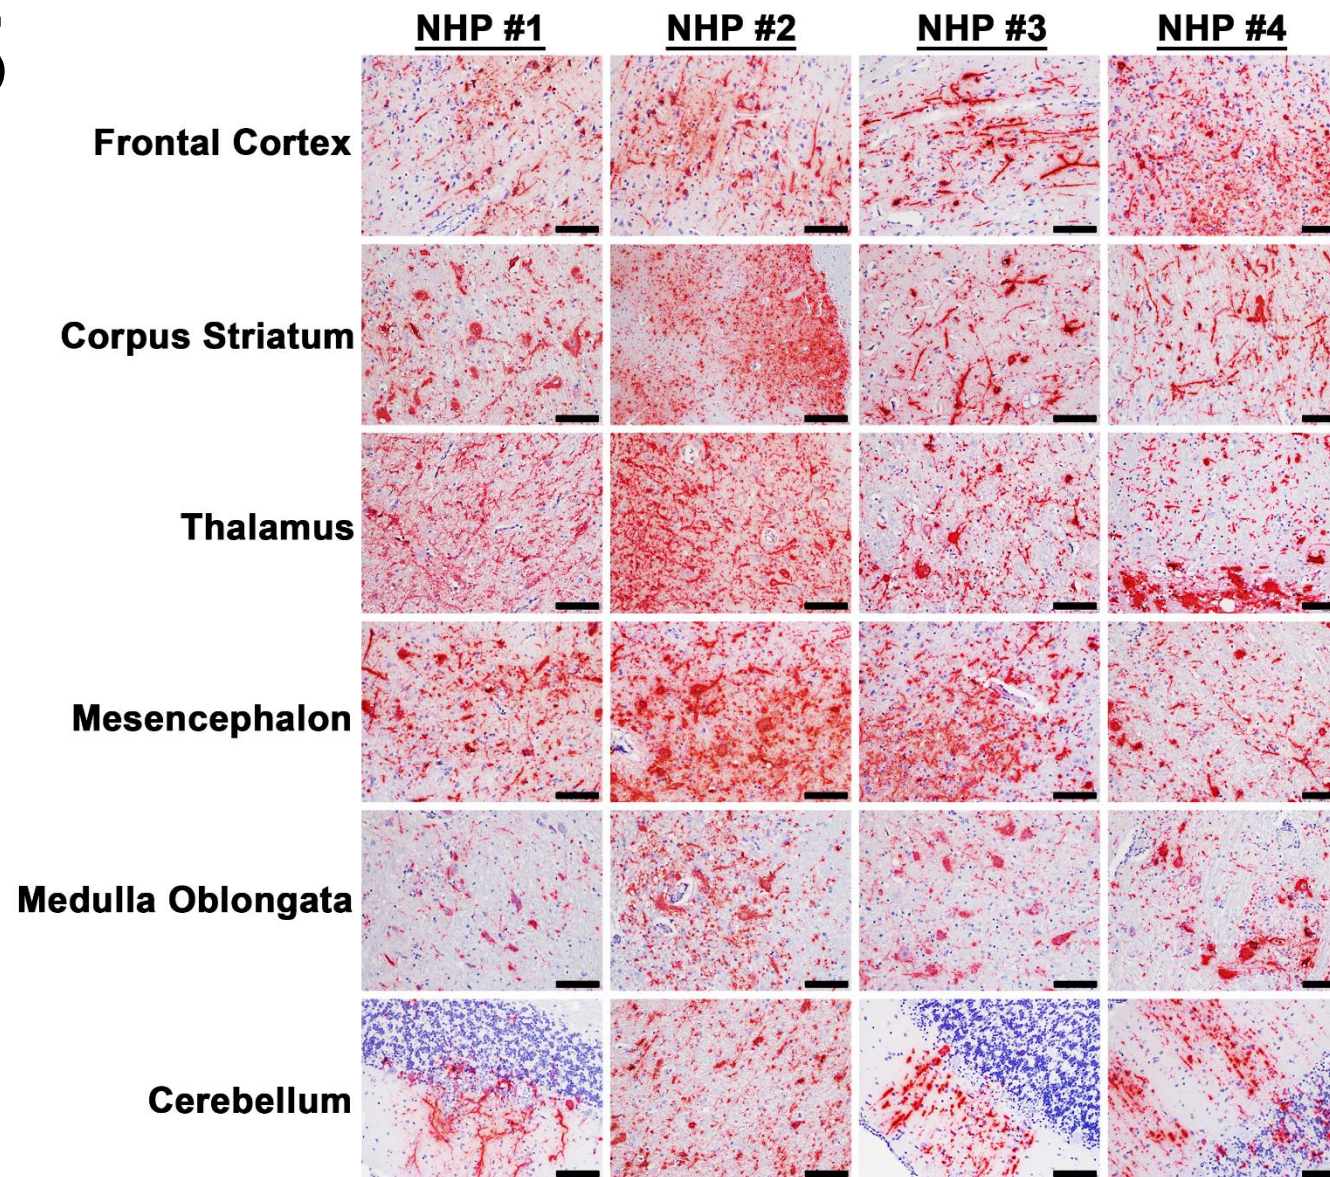

# Figure 6

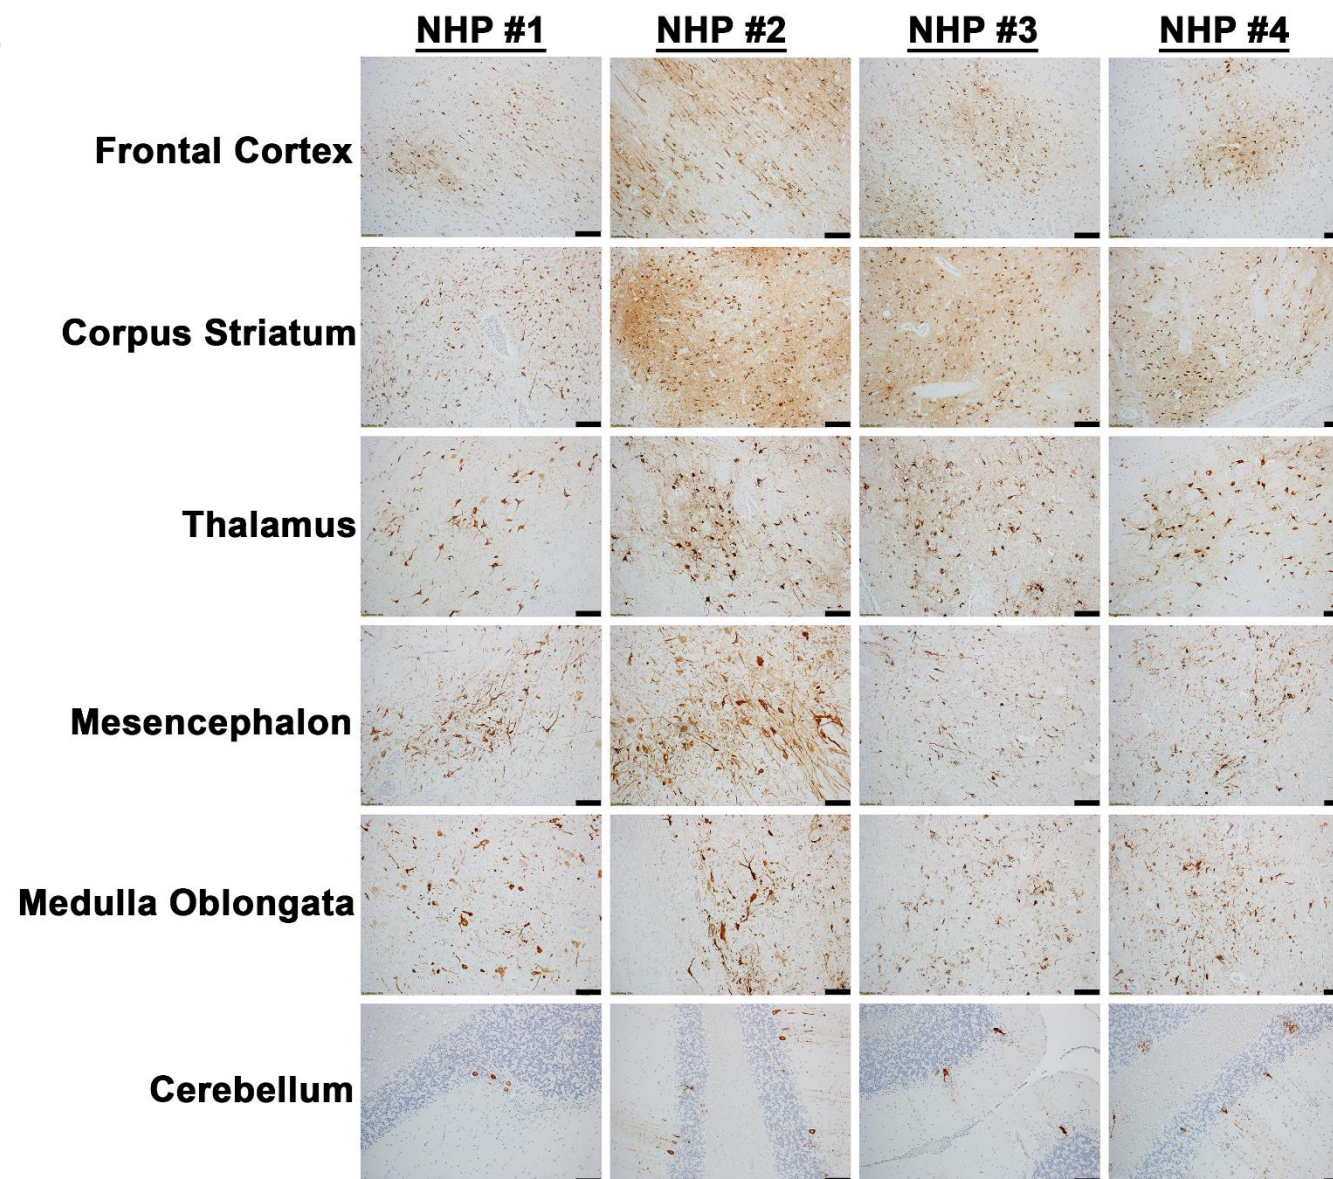

# Figure 7

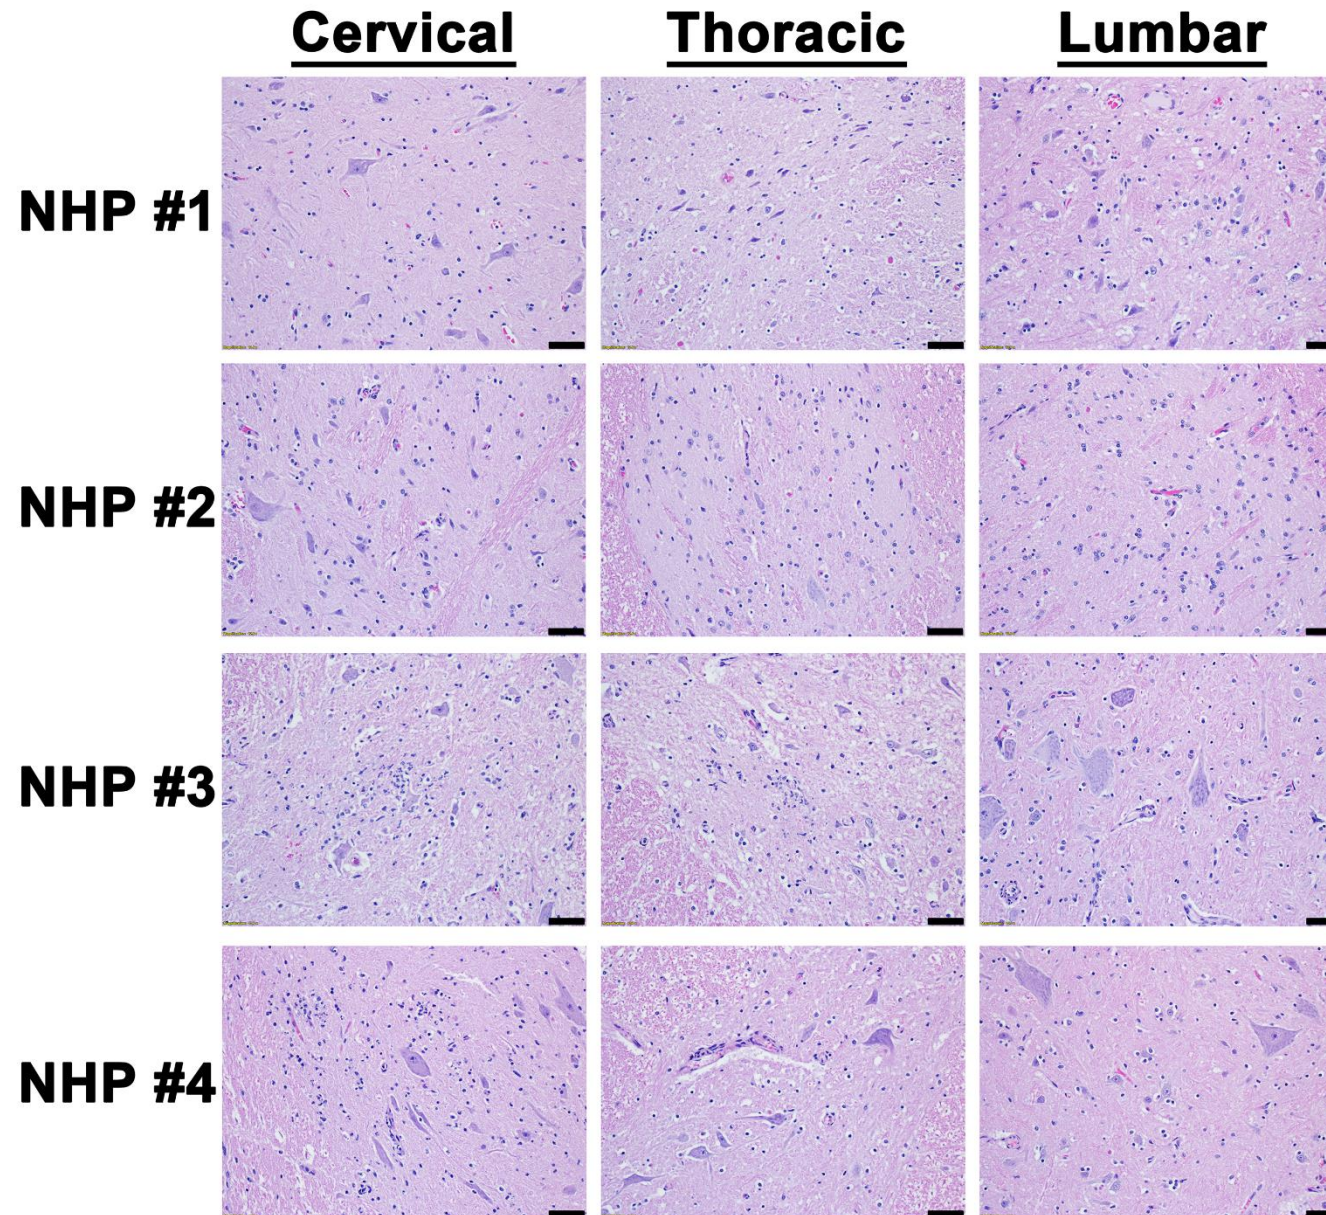

# Figure 8

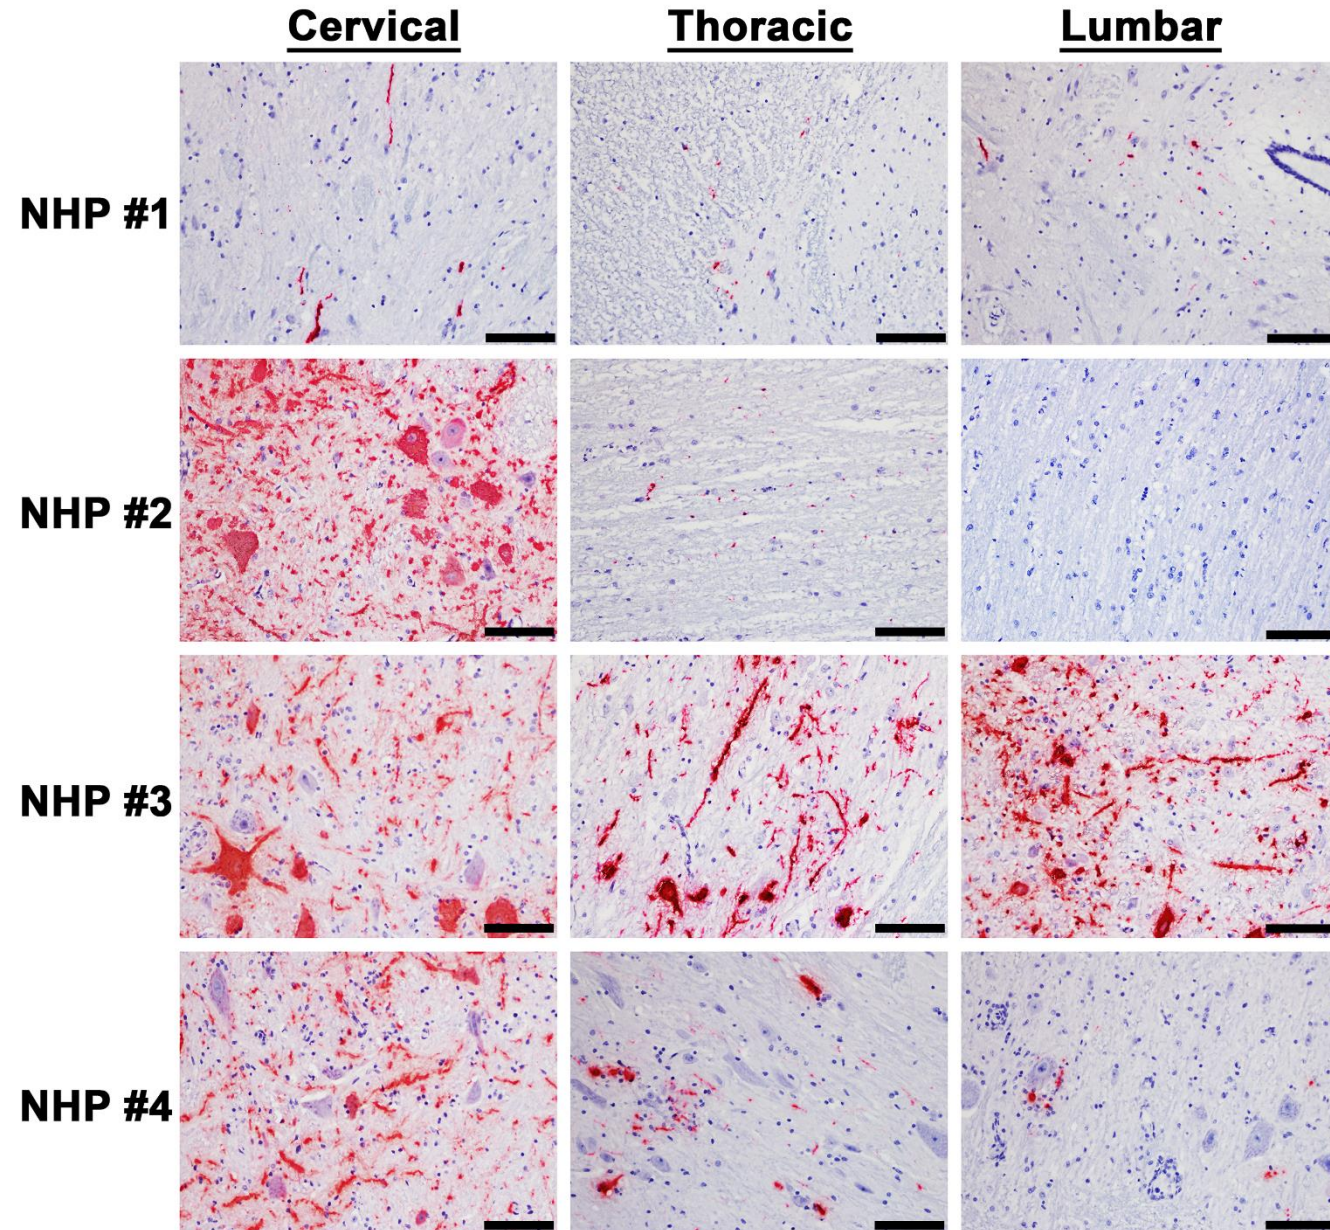

# Figure 9

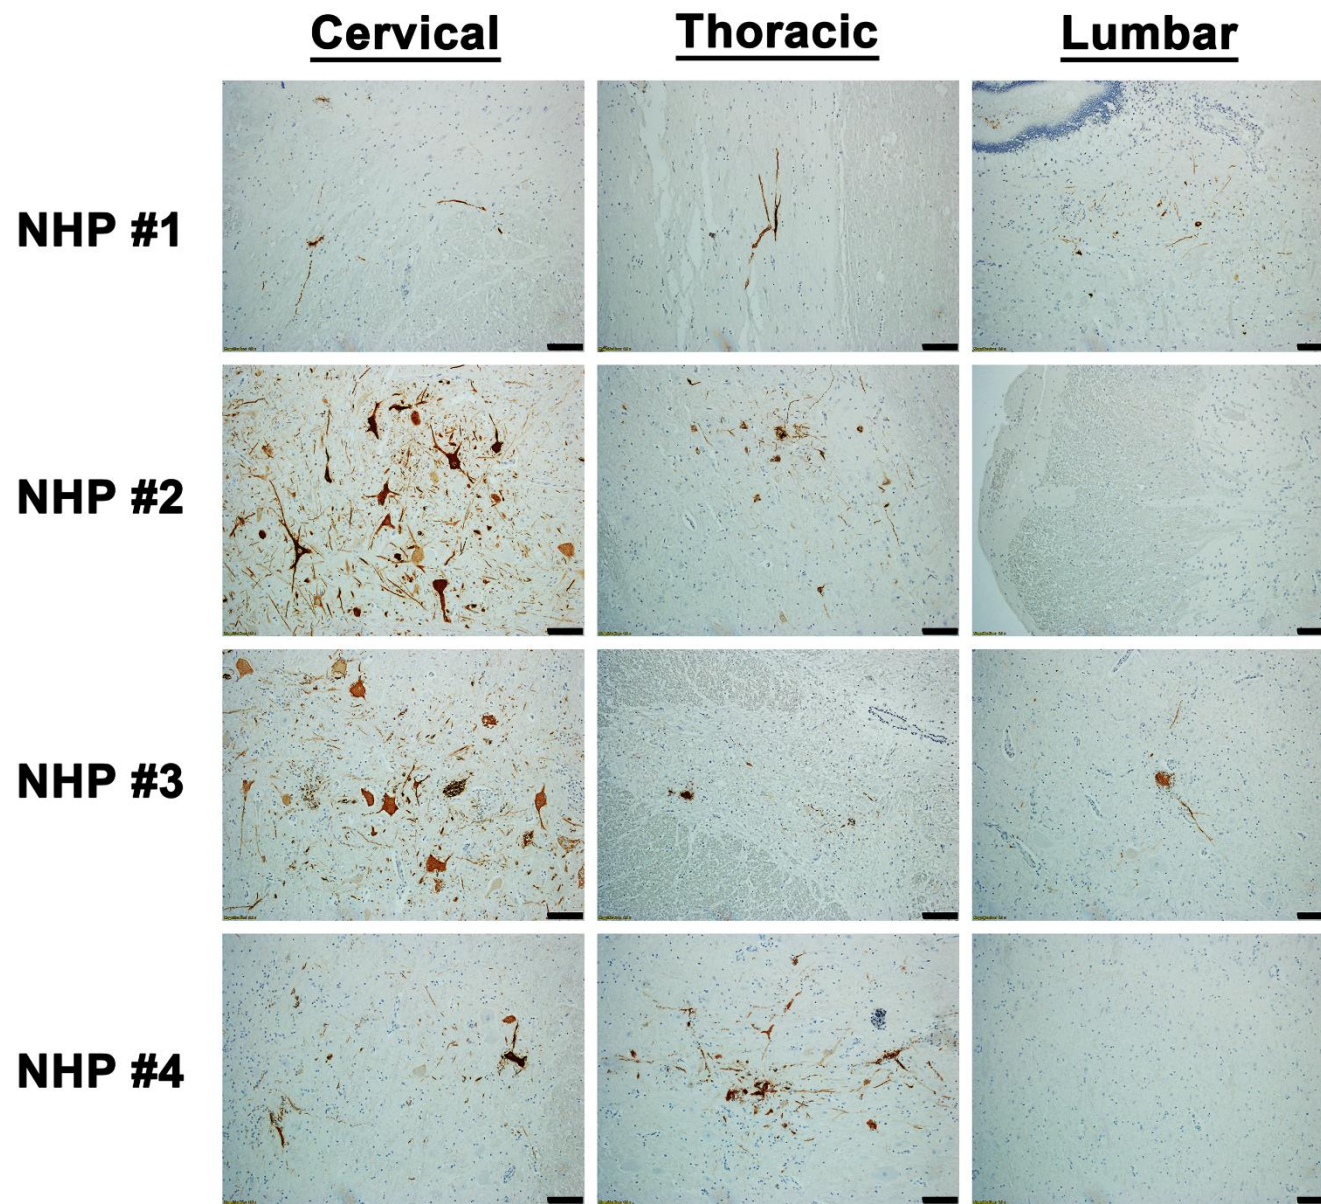

# Figure 10

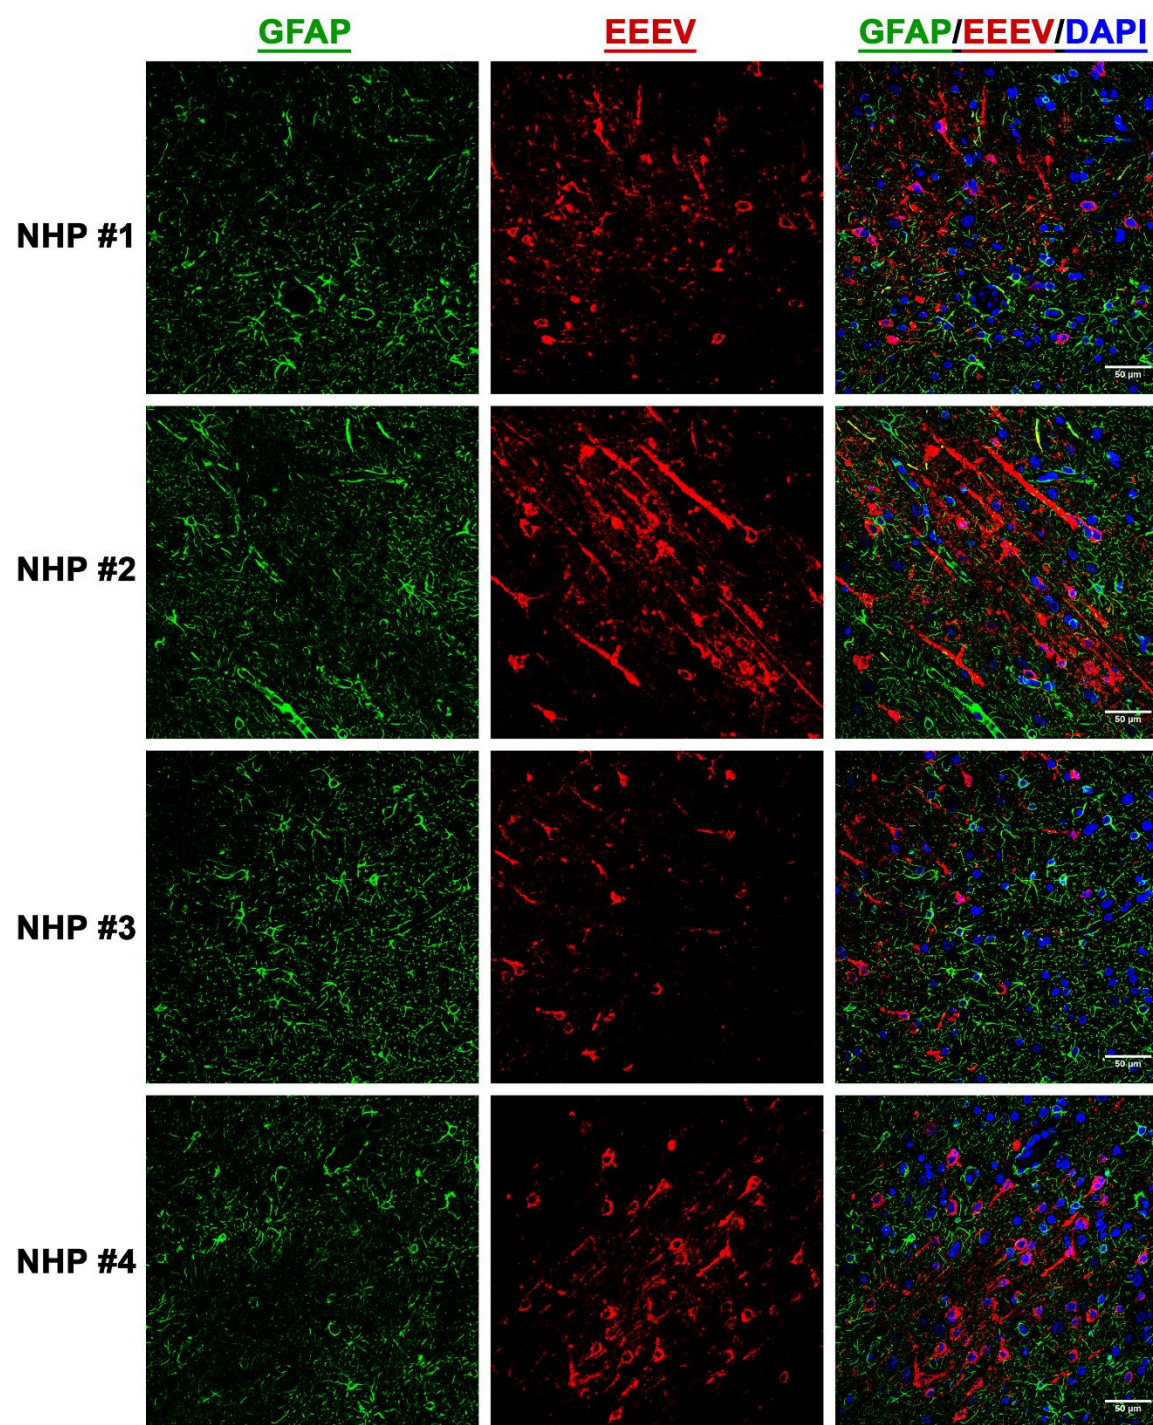

# Figure 11

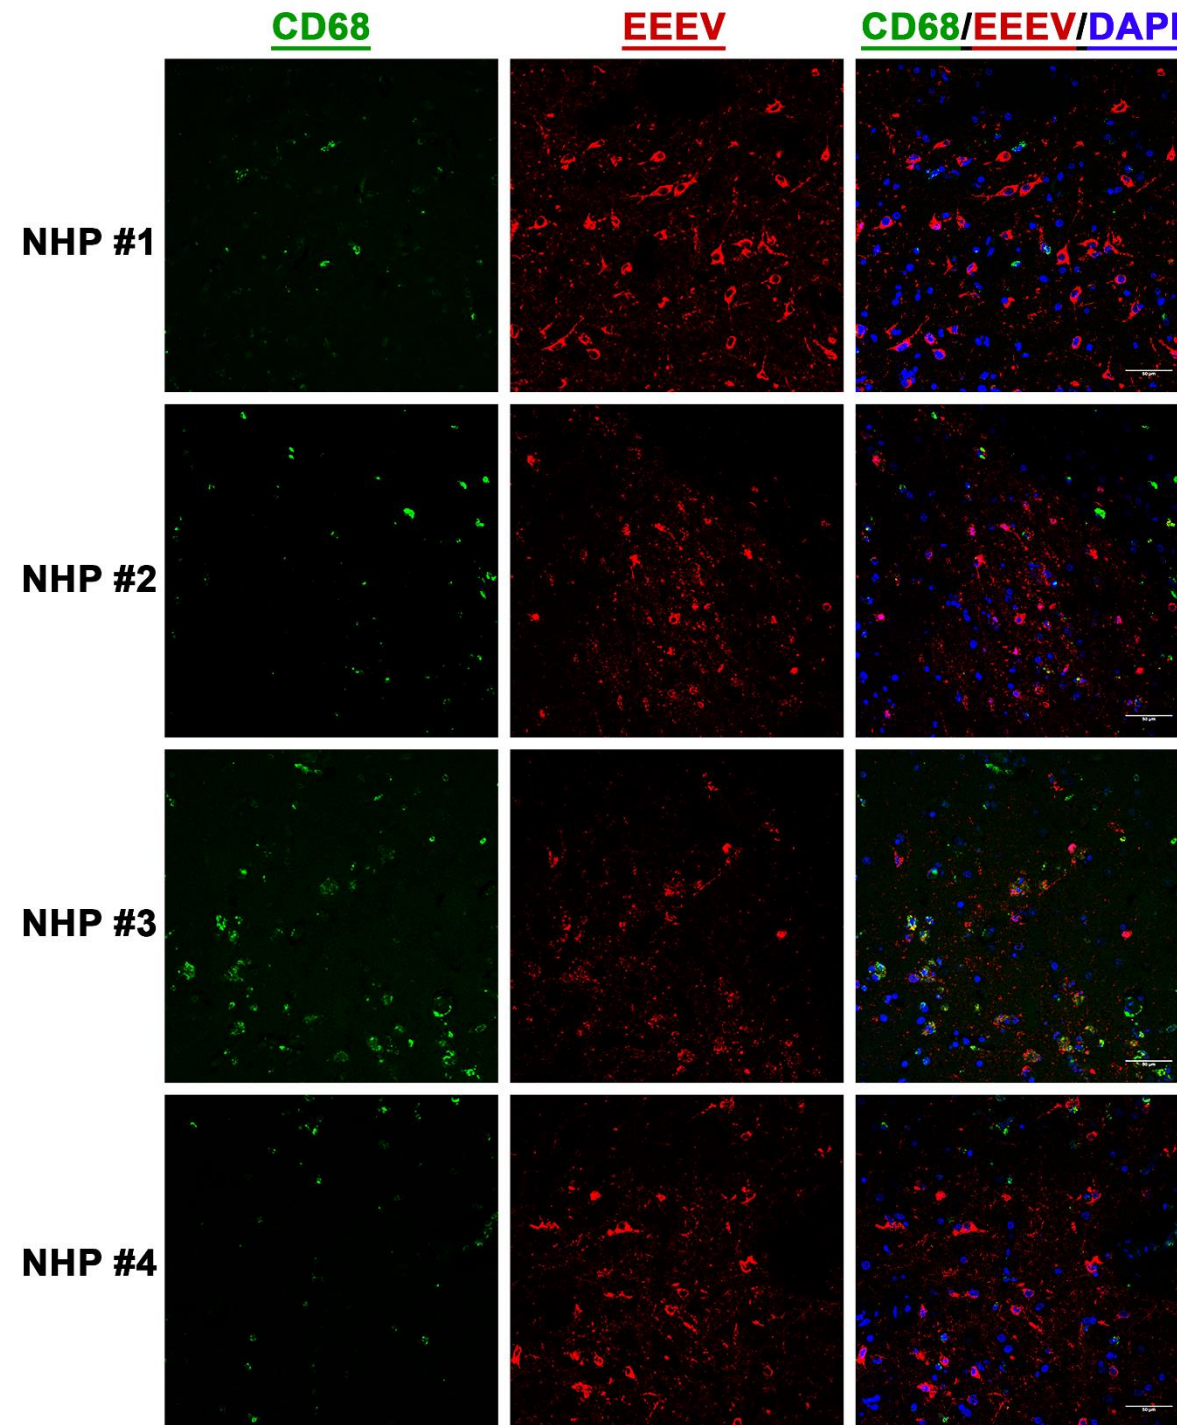



# Figure 12

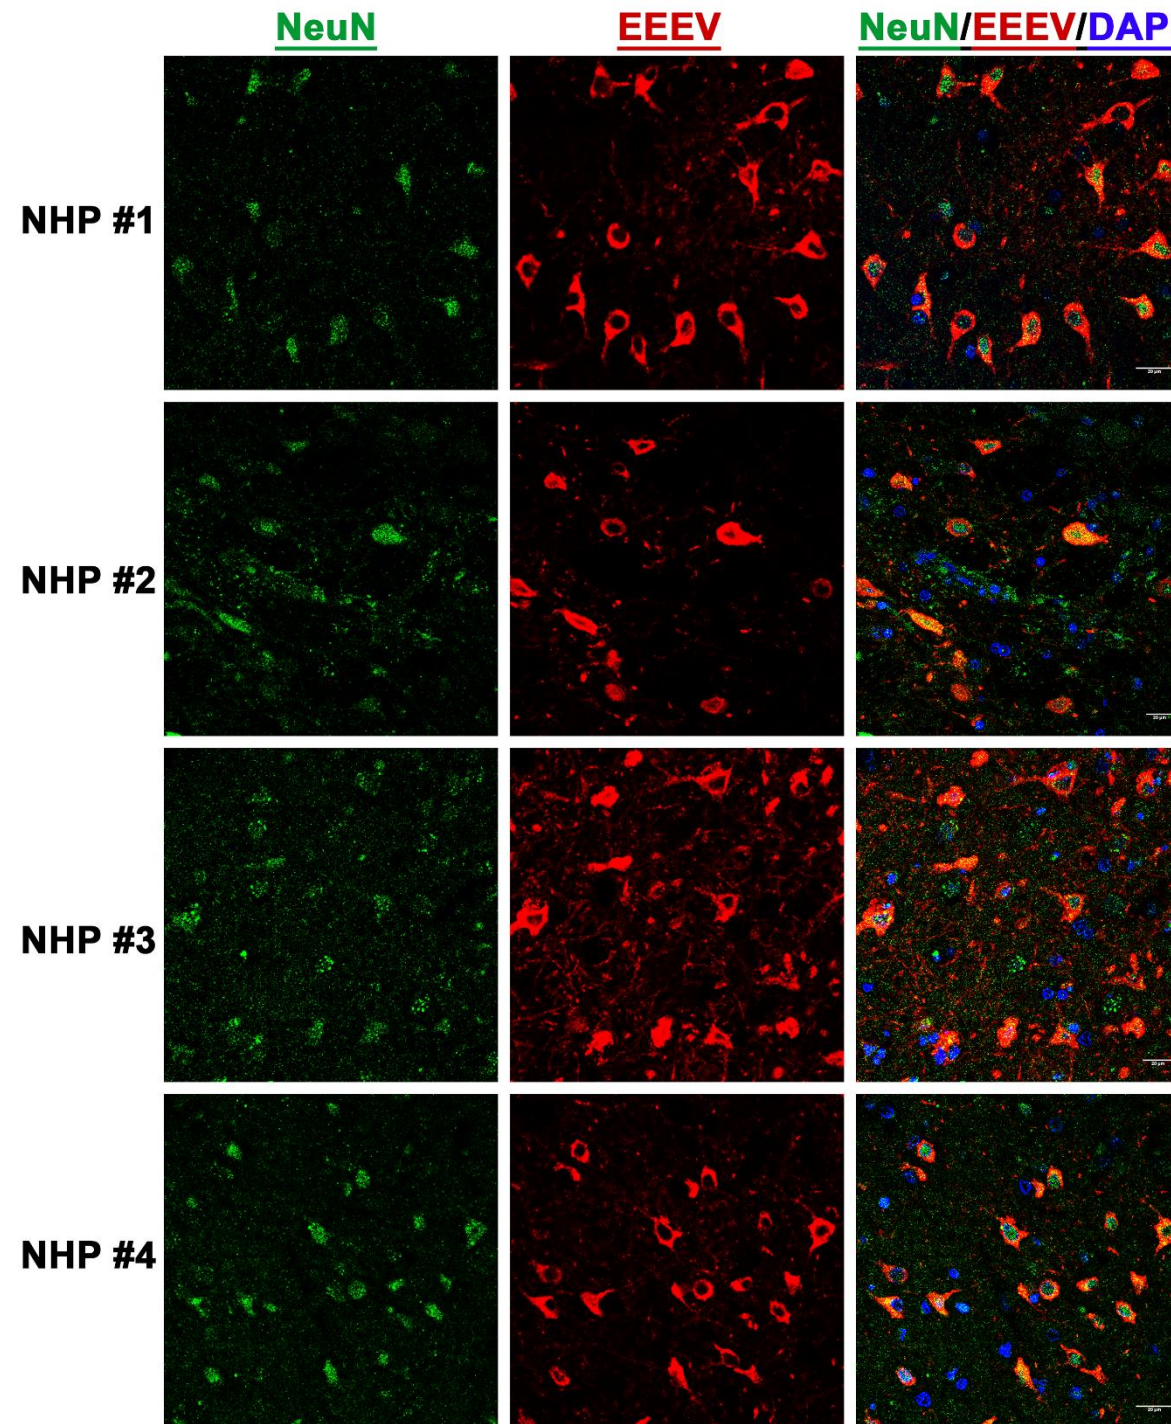

Figure 13

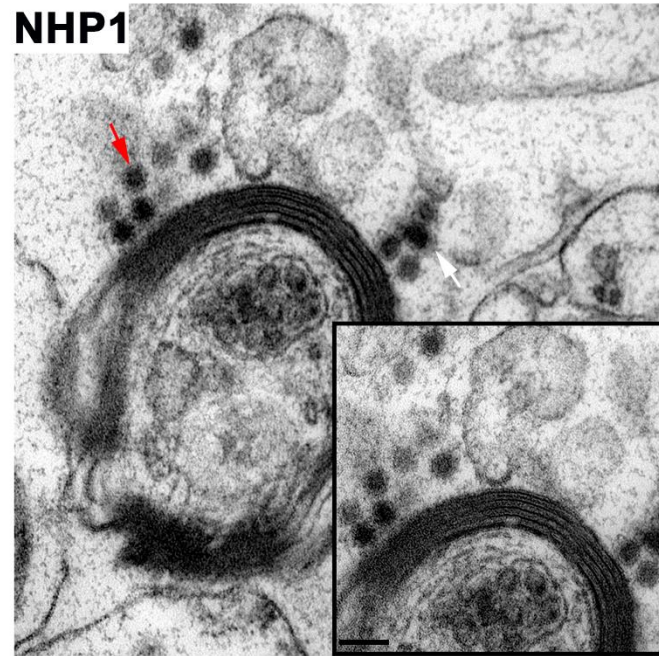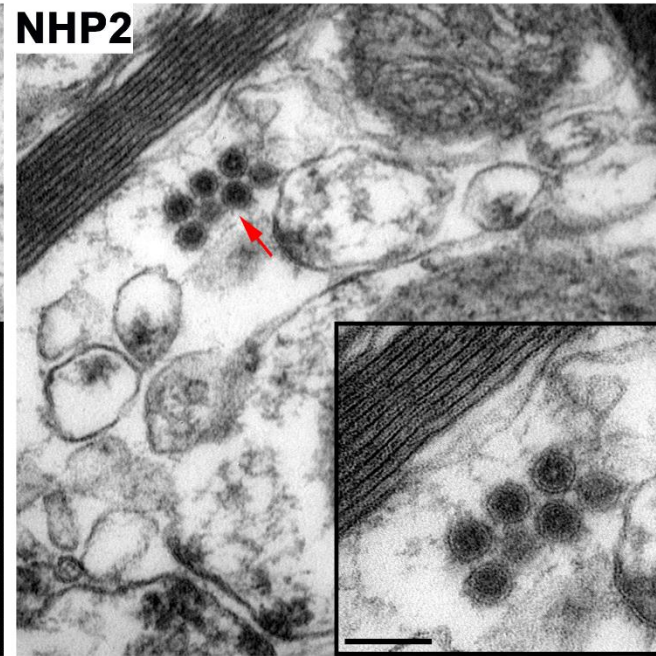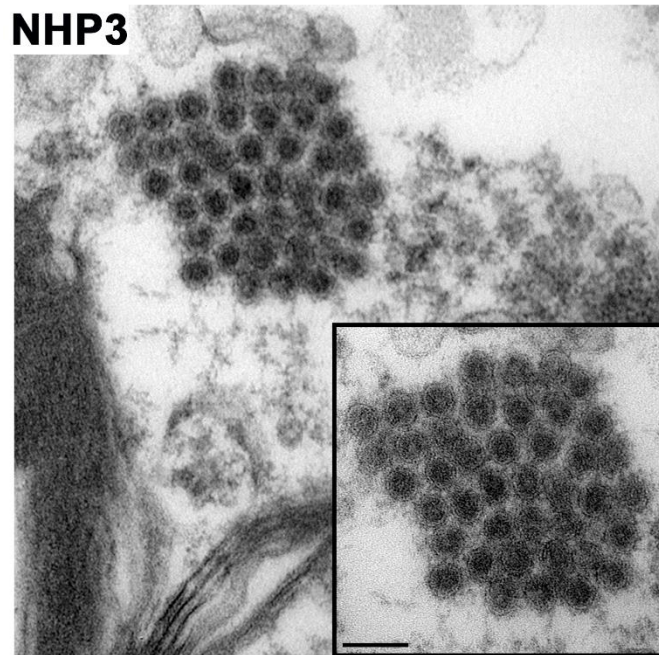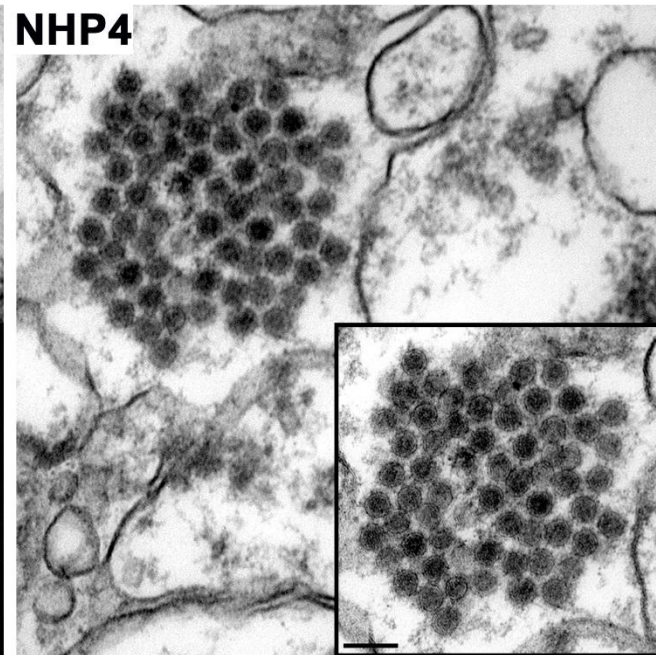

# Figure 14

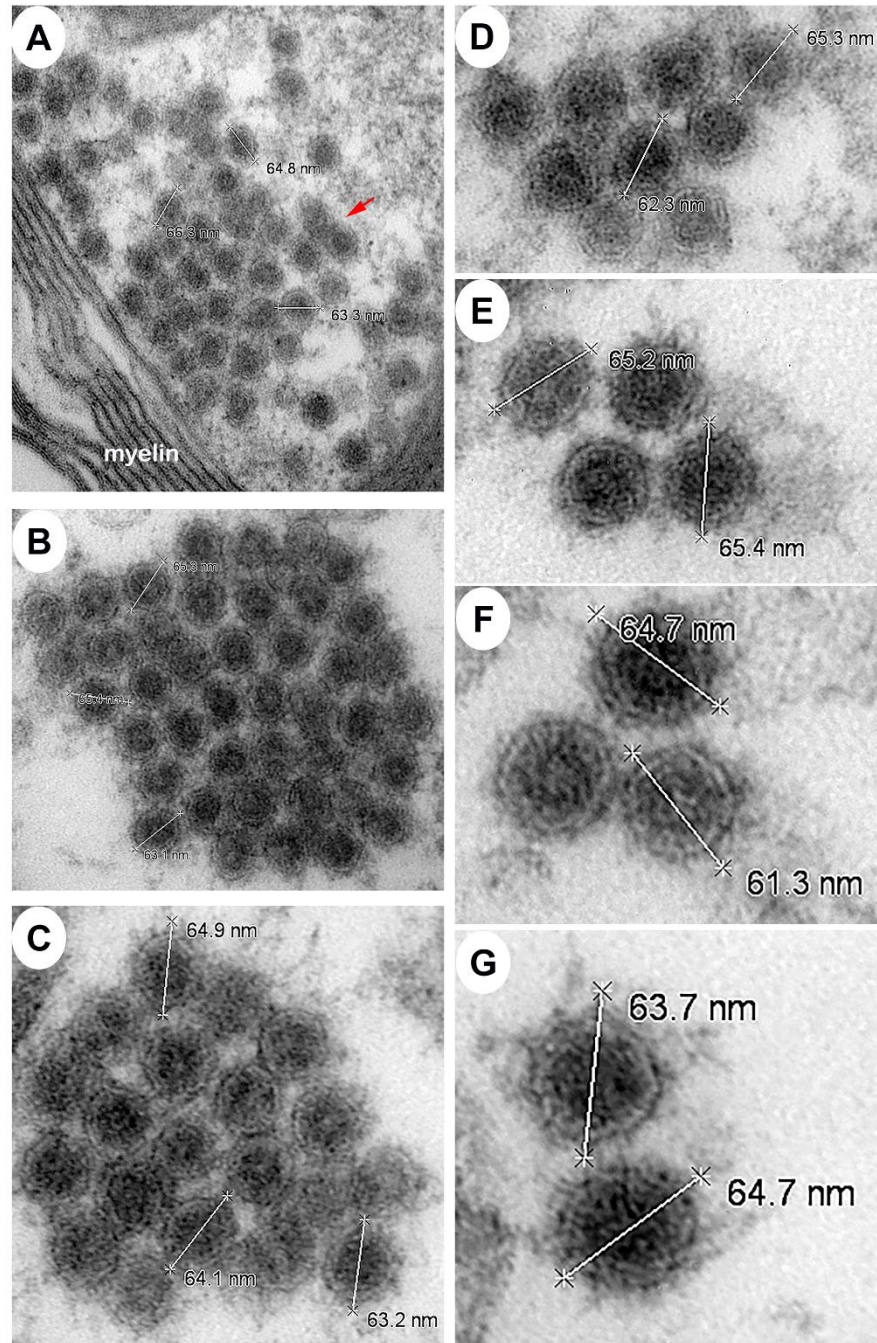

# Figure 15

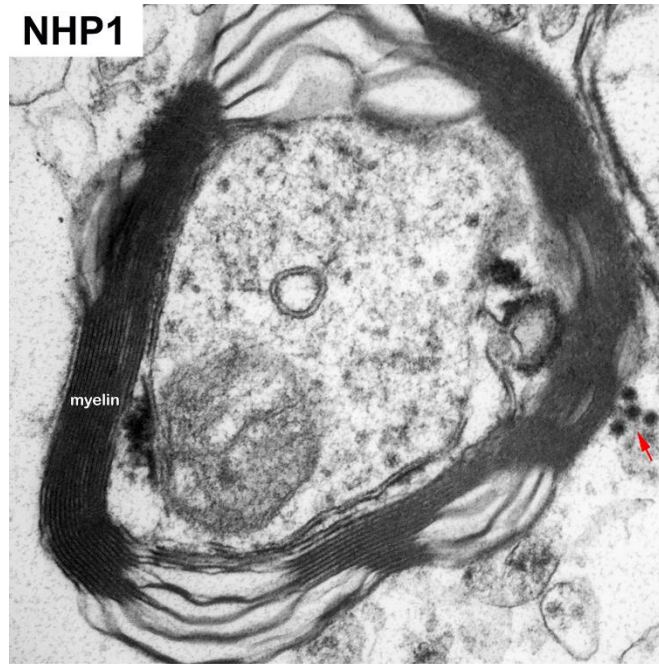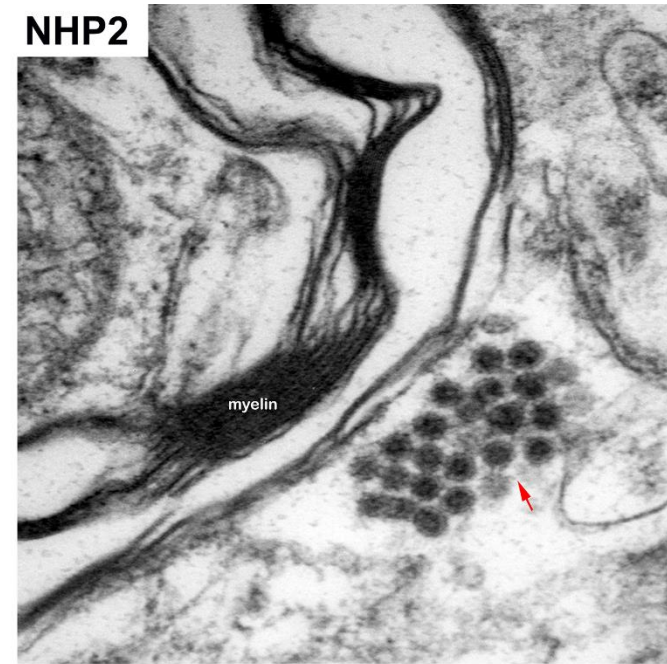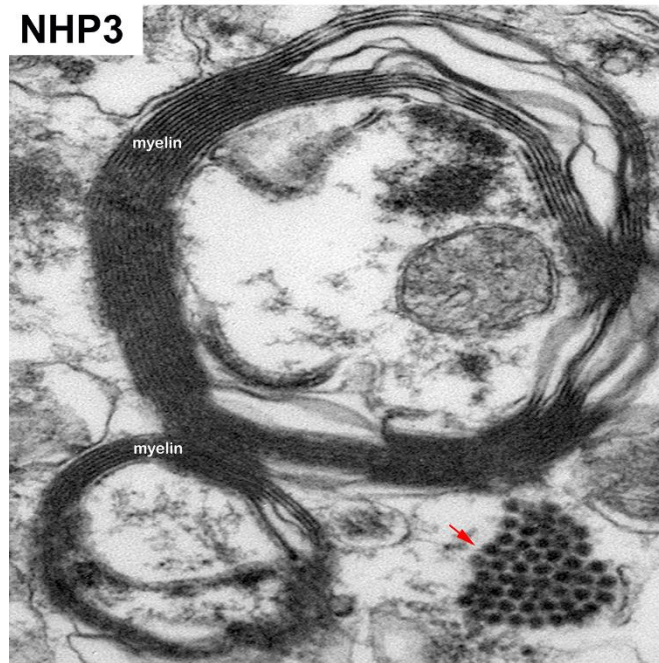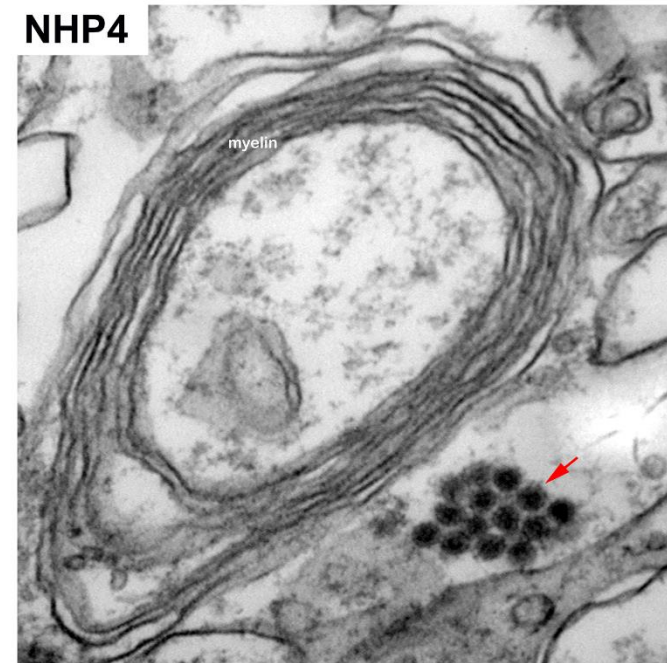

# Figure 16

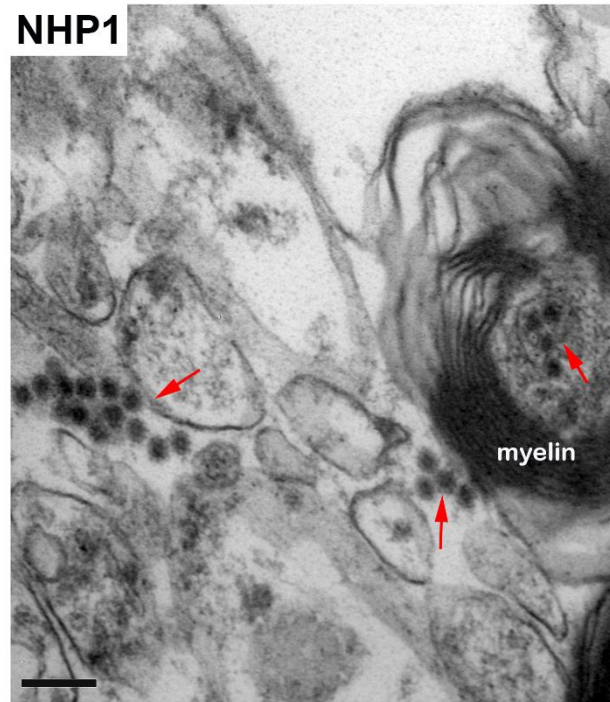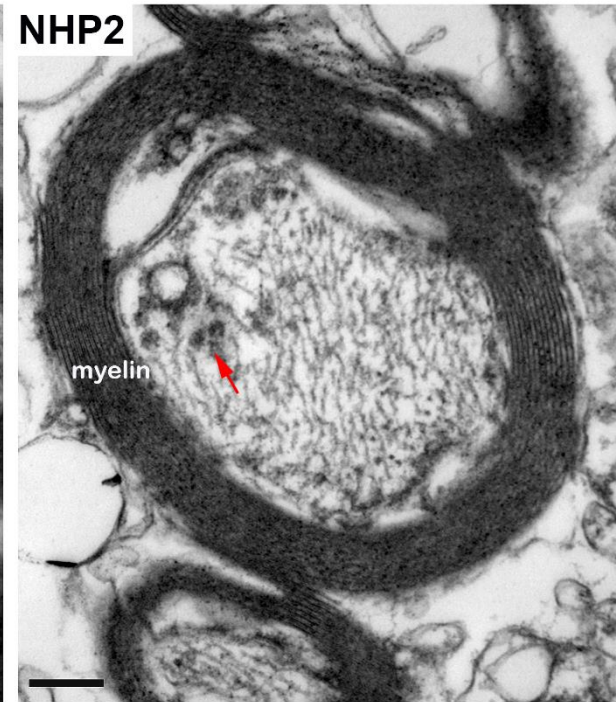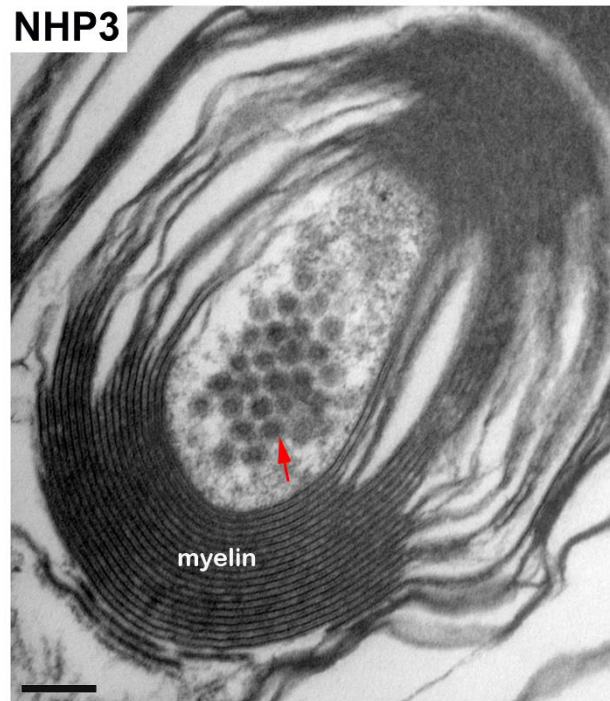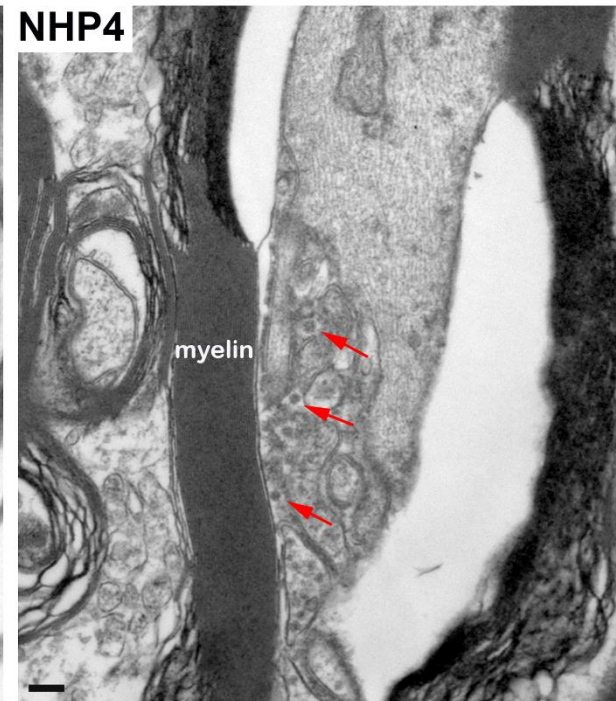

# Figure 17

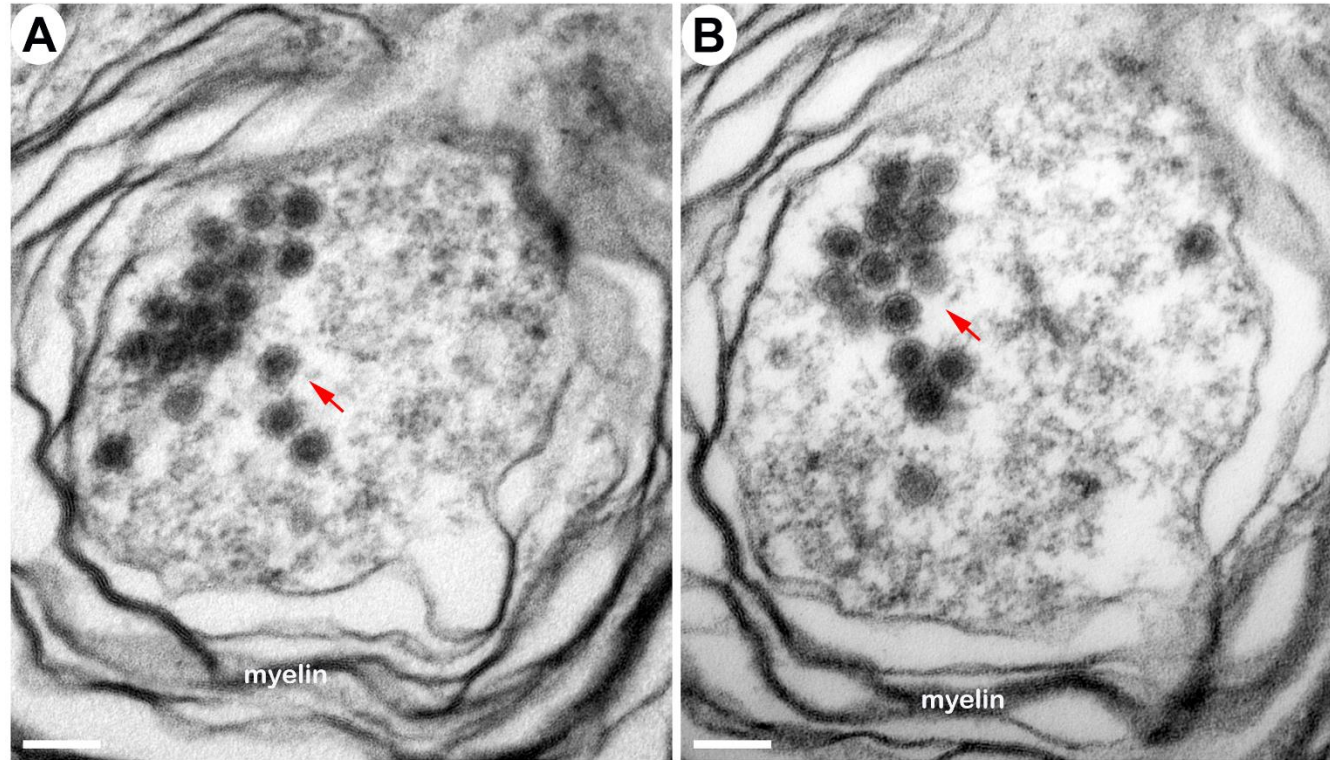

# Figure 18

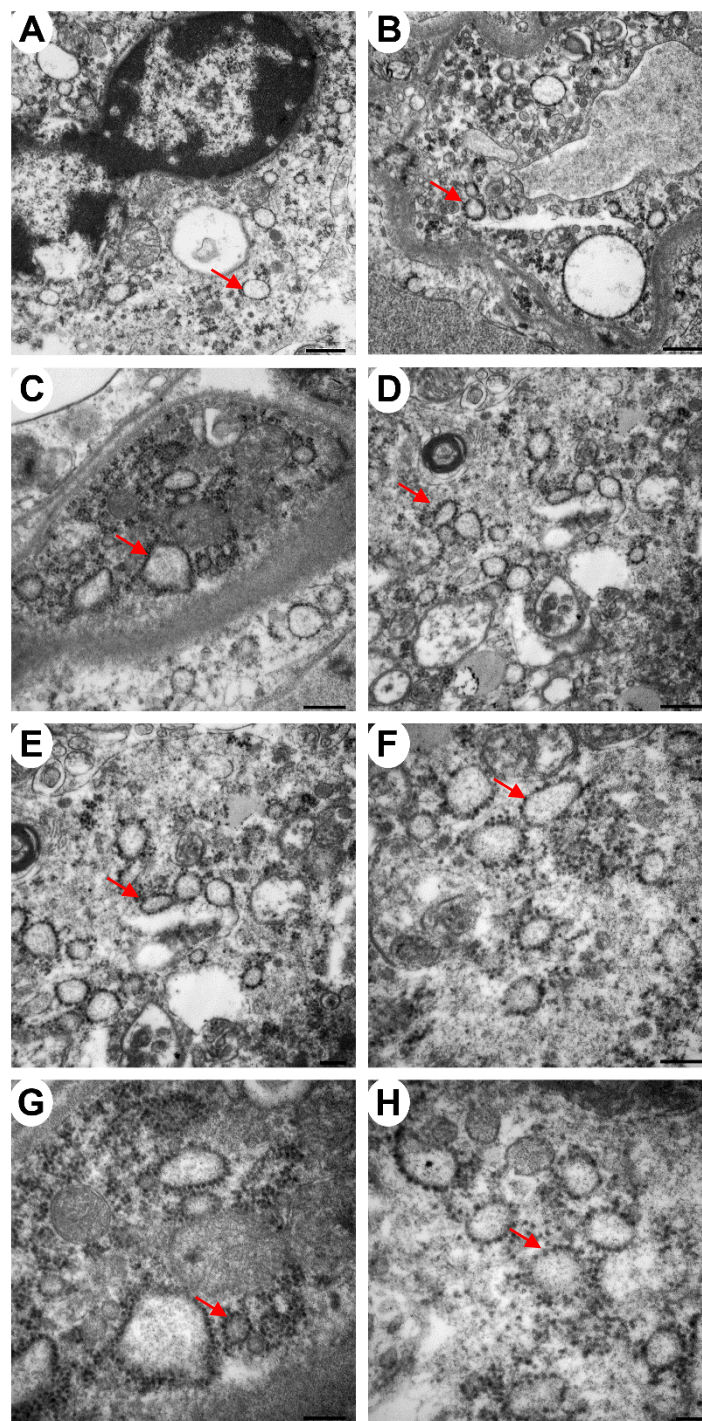

# Figure 19

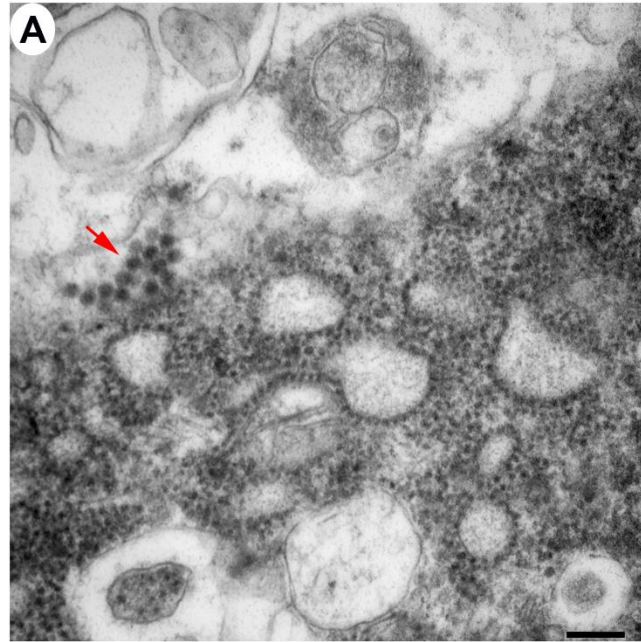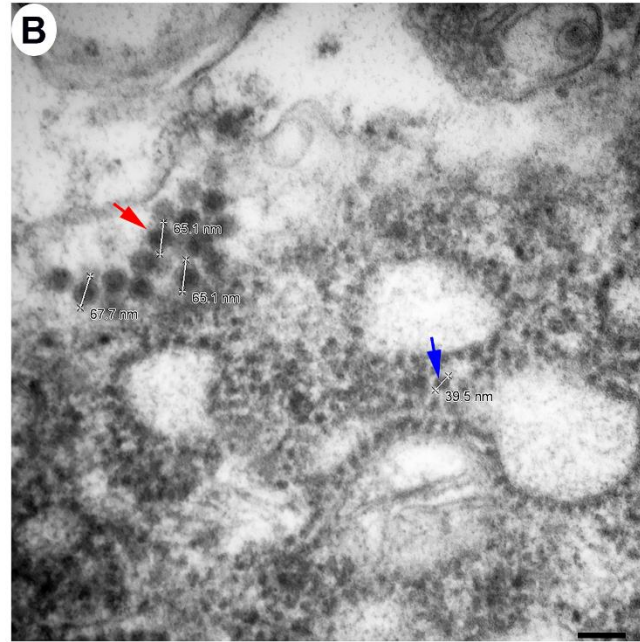



# Figure 20

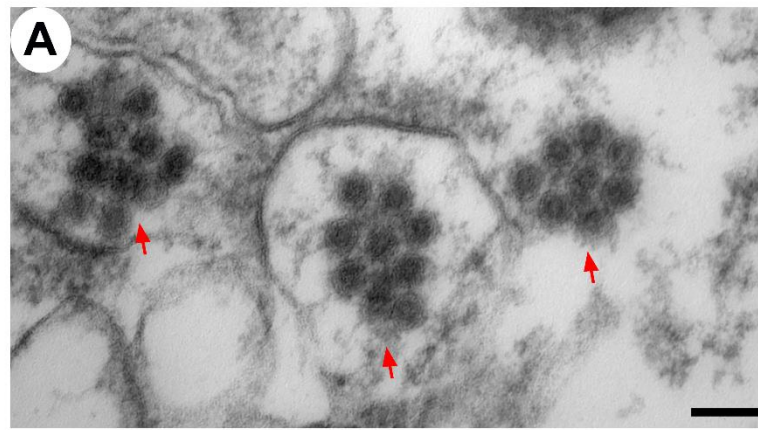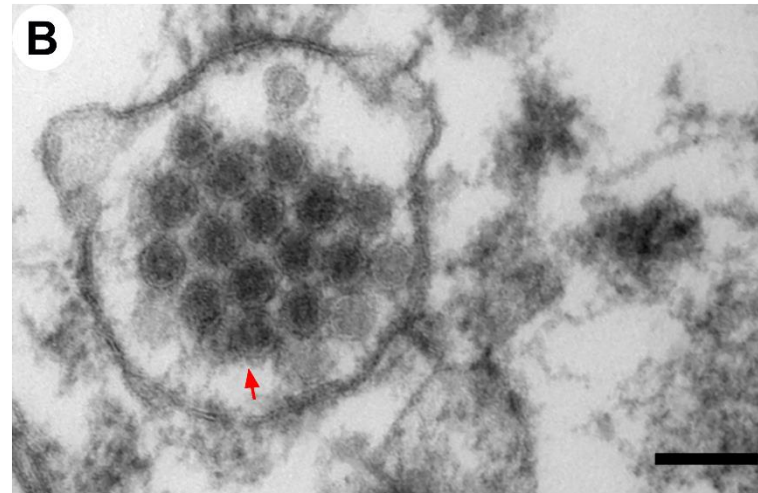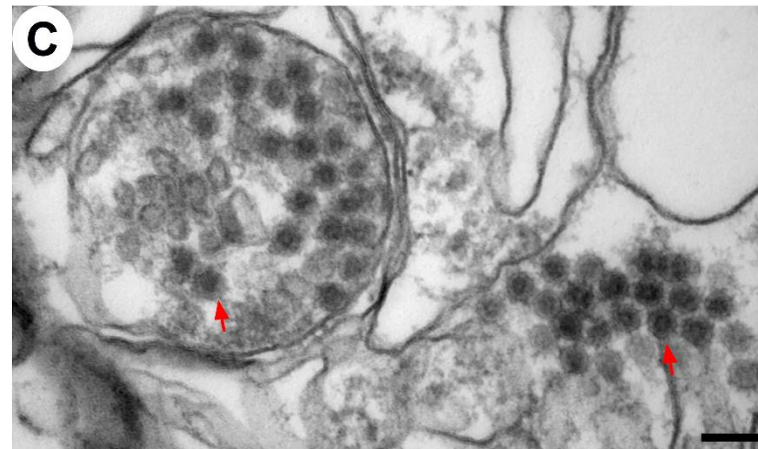

# Figure 21

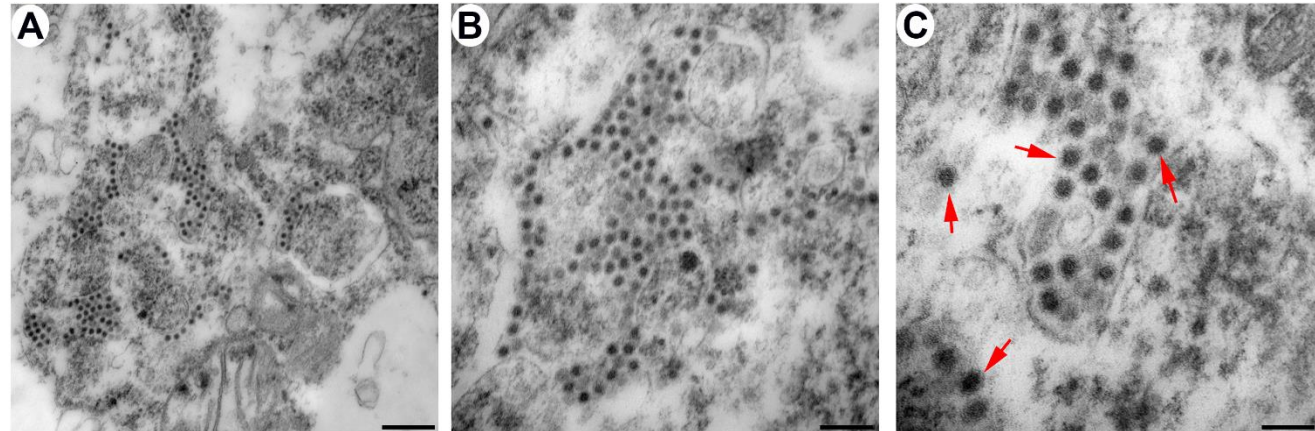

Source: https://www.biorxiv.org/content/10.1101/2020.12.21.423836v1.full.pdf
